1

2 **Adult fibroblasts retain organ-specific transcriptomic identity**

3

4 Elvira Forte<sup>1§</sup>, Mirana Ramialison<sup>2,3,4§</sup>, Hieu T. Nim<sup>2,3,4§</sup>, Madison Mara<sup>1</sup>, Rachel Cohn<sup>5</sup>,  
5 Sandra L. Daigle<sup>1</sup>, Sarah Boyd<sup>6</sup>, J.Travis Hinson<sup>5</sup>, Mauro W. Costa<sup>1</sup>, Nadia A.  
6 Rosenthal<sup>1,6,£</sup>, Milena B. Furtado<sup>1,£\*</sup>

7

8 <sup>1</sup> The Jackson Laboratory, Bar Harbor, ME 04609, USA

9 <sup>2</sup> The Australian Regenerative Medicine Institute, Monash University, Clayton, VIC 3800,  
10 Australia

11 <sup>3</sup> Systems Biology Institute Australia, Clayton, VIC 3800, Australia

12 <sup>4</sup> Murdoch Children's Research Institute, Parkville, VIC 3052, Australia

13 <sup>5</sup> The Jackson Laboratory, Farmington, CT 06032, USA

14 <sup>6</sup> Centre for Inflammatory Diseases, School of Clinical Sciences at Monash Health, Monash  
15 University, Clayton, VIC 3168, Australia

16 <sup>7</sup> National Heart and Lung Institute, Imperial College London, London SW72BX, UK

17 \*Current address: Amgen Inc, South San Francisco, CA 94080, USA

18

19 <sup>§,£</sup> These authors contributed equally to this work

20

21 **Corresponding authors:**

22 Milena Furtado - [mfurtado@amgen.com](mailto:mfurtado@amgen.com)

23 Elvira Forte – [elvira.forte@jax.org](mailto:elvira.forte@jax.org)

24

25 **Abstract**

26 Organ fibroblasts are essential components of homeostatic and diseased tissues. They  
27 participate in sculpting the extracellular matrix, sensing the microenvironment and  
28 communicating with other resident cells. Recent studies have revealed transcriptomic  
29 heterogeneity among fibroblasts within and between organs. To dissect the basis of inter-  
30 organ heterogeneity, we compare the gene expression of fibroblasts from different tissues  
31 (tail, skin, lung, liver, heart, kidney, gonads) and show that they display distinct positional  
32 and organ-specific transcriptome signatures that reflect their embryonic origins. We  
33 demonstrate that fibroblasts' expression of genes typically attributed to the surrounding  
34 parenchyma is established in embryonic development and largely maintained in culture,  
35 bioengineered tissues, and ectopic transplants. Targeted knockdown of key organ-specific  
36 transcription factors affects fibroblasts functions, with modulation of genes related to  
37 fibrosis and inflammation. Our data open novel opportunities for the treatment of fibrotic  
38 diseases in a more precise, organ-specific manner.

39

40 **Introduction**

41 Fibroproliferative disorders are the main cause of mortality and morbidity in the developed  
42 countries, accounting for about 45% of deaths in the United States [1]. Despite the  
43 impactful prevalence of chronic organ fibrosis, current anti-fibrotic drugs are both  
44 inefficient and non-specific to this condition [2, 3]. Fibroblasts, main players in fibrosis,  
45 have gained increased attention for their capacity to provide functions far beyond their  
46 canonical secretion of extracellular biological scaffolding and formation of scar tissue after  
47 injury. Recent literature poses the organ fibroblast as a major regulatory hub that senses  
48 local microenvironment imbalances and controls tissue remodeling [4] upon activation and  
49 phenotypic differentiation into the pro-fibrotic myofibroblast [5]. They are also involved  
50 in immunomodulation [6], by producing and responding to cytokines and activate immune  
51 cells of the innate and adaptive immune systems [7, 8], through organ-specific regulatory  
52 networks [9].

53 Organ fibroblasts have been historically difficult to identify and study *in vivo*, due to their  
54 vague functional definition and lack of adequate markers that label organ fibroblast pools  
55 completely and specifically [10]. Recent advances in lineage tracing and multiomics  
56 single-cell analyses have revealed a significant heterogeneity of fibroblasts within and  
57 among tissues, and we are just beginning to understand how fibroblast heterogeneity  
58 corresponds to distinct functions [3, 11-14]. Despite being morphologically similar,  
59 spindle-shaped mesenchymal cells located in stromal tissues, fibroblasts acquire  
60 specialized functions related to their anatomical position [9, 15, 16] and appear to retain a  
61 positional memory of the embryonic developmental axis: anterior-posterior, proximal-  
62 distal and dermal non-dermal, possibly reflecting their role in conveying positional identity  
63 in embryogenesis [17-20], suggesting responsiveness to molecular cues that drive body  
64 compartmentalization. Fibroblast heterogeneity within an organ tends to arise from the  
65 distinct embryological origin and/ or anatomical localization [12, 14, 21, 22], while inter-  
66 organ differences have been mostly ascribed to the matrisome, as shown by the  
67 transcriptomic comparison among fibroblasts from muscular tissues [21].

68 Having previously reported that fibroblasts isolated from the adult mouse heart retain a  
69 cardiogenic transcriptional program [23], we show here that fibroblasts isolated from  
70 different adult organs similarly retain the expression of transcription factors and other gene

## *Fibroblast organ code*

71 sets involved in the determination of organ formation and patterning during embryonic  
72 development. This signature is captured in nascent embryonic organ fibroblasts, retained  
73 in isolated adult cultured cells, in co-culture with parenchymal cells from different organs,  
74 or when ectopically transplanted into a different organ *in vivo*, despite adaptation to the  
75 new environment. The robustness of the fibroblast organ transcriptome signature under  
76 different microenvironmental challenges supports its importance for organ interaction,  
77 connectivity and function. In addition, knock-down of selected organ development  
78 transcription factors in cardiac fibroblasts de-regulated the expression of genes involved in  
79 inflammation, fibrosis and ECM deposition, further supporting the relevance of these genes  
80 in fibroblasts function. In summary, our study uncovers stable expression of organ-specific,  
81 development-related signature genes in adult fibroblasts, thus offering new prospects for  
82 possible targeted anti-fibrotic therapies.

83

## 84 **Results**

85 Metabolic and extracellular matrix components comprise a generic fibroblast gene  
86 signature

87 To compare the gene signature of fibroblasts from different organs and eliminate potential  
88 RNA contaminants from other organ cell types, dissociated adult murine tissues were  
89 cultured for five days, followed by sorting for CD45<sup>-</sup> CD31<sup>-</sup> CD90<sup>+</sup> fibroblasts [23]  
90 (**Supplementary Fig. 1**). High-throughput gene expression profiling identified 1281  
91 highly expressed genes common to all fibroblast types, comprising the generic fibroblast  
92 signature (**Supplementary Table 1**).

93 Through Ingenuity Pathway Analysis (IPA, Qiagen), we classified the commonly  
94 expressed genes based on cellular function (**Supplementary Fig. 2a**), and cellular  
95 localization (**Supplementary Fig. 2b**). Top functions included mechanisms of cell  
96 maintenance, such as proliferation, cytoskeletal arrangement and cell movement, as well  
97 as general metabolic processes, including carbohydrate, nucleic acid protein and small  
98 molecule biochemistry. Common fibroblast identifier genes were encountered within  
99 various IPA process classification groups. As an example, the cell surface receptor CD90  
100 (*Thy1* gene) belongs with cellular assembly and organization, growth and proliferation and

## *Fibroblast organ code*

101 protein synthesis, while the myofibroblast marker smooth muscle actin (*Acta2* gene) was  
102 found in functions of cellular movement. The presence of CD90 and absence of CD31  
103 (*Pecam1* gene)/CD45(*Ptprc* gene) in all organ groups validated our positive/negative  
104 selection strategy for cell isolation, indicating a generally consistent population of cells in  
105 all organs. Extracellular matrix (ECM) elements, including collagens, were included in  
106 several functional annotations, such as to cell morphology, assembly and organization,  
107 cellular compromise, function and maintenance or cell signaling.

108 In terms of cellular localization, most fibroblast identifier genes encoded proteins localized  
109 to the cytoplasm (**Supplementary Fig. 2b, Supplementary Table 1**). Fibroblasts are  
110 generally defined as ECM secreting cells. Common ECM genes consistently present  
111 amongst fibroblast samples included collagens *Colla1*, *Colla2*, *Col3a1*, *Col4a3* and  
112 *Col5a1* (**Supplementary Fig. 2b**). Other extracellular genes encoded members of secreted  
113 *Tgfb*, *Fgf*, *Ins*, *Igfl* *Vegf*, *Egf*, *Notch* and *Wnt* pathways (**Supplementary Table 1**). Among  
114 membrane genes were integrins *Itga3/9*, *Itgb3/6*, collagen receptor *Ddr1*, and importantly,  
115 receptors for adrenalin (*Adrb1*), acetylcholine (*Chrm1*), angiotensin II (*Agtr1*, *Agtr2*) and  
116 calcium (*Cacna1c*) and potassium (*Kcnab1* and *Kcnj11*) channels. The nuclear and  
117 cytoplasmic gene fractions included mostly housekeeping genes, but also *Acta2* and  
118 fibroblast markers filaminA (*Flna*) and vimentin (*Vim*). The small fraction of genes not  
119 classified by the IPA cell compartment analysis, including the growth factor neuregulin 1  
120 (*Nrg1*), were placed in the category “Other”.

### 121 Organ fibroblasts retain *HOX* codes

122 The *HOX* code defines body segmental identity and is highly conserved from flies to  
123 mammals. *HOX* genes show colinear expression and undergo chronological activation in  
124 the embryo, where upstream genes successively activate downstream genes in an antero-  
125 posterior fashion, such that upstream genes are activated first in more anterior segments of  
126 the body. In mammals, the *HOX* cluster has undergone a series of duplications and  
127 deletions that led to the formation of four paralogous clusters a, b, c and d (**Fig. 1a**).

128 Site-specific *HOX* expression has been previously reported in human skin fibroblasts [17,  
129 18, 20] and mouse mesenchymal cells isolated from different organs [19], and it has been  
130 shown to be cell-autonomous and epigenetically maintained, suggesting a source of

## *Fibroblast organ code*

131 positional memory to differentially pattern tissue-specific homeostasis and regeneration.  
132 To determine if fibroblasts isolated from other adult organs retain a distinct *HOX* signature,  
133 we plotted the average raw expression of all *HOX* genes per each fibroblast type (**Fig. 1b**  
134 **and Supplementary Figure 3, Table 2**). Among profiled organs, five patterns of *HOX*  
135 expression were identified: lung and liver showed expression of anterior *HOX* genes, in  
136 particular genes from the clusters 1 to 7, although liver had lower *HOX 4-7* expression  
137 when compared with lung. A second group including skin and gonad displayed high *HOX*  
138 6 expression, with skin from thoracic and abdominal ventral skin areas also expressing  
139 high *HOX 9* gene levels. The third classification group was represented by the heart,  
140 characterized by low *HOX* gene expression. This may reflect embryonic developmental  
141 processes, as *HOX* genes are known to exert minimal influence on heart formation, and are  
142 generally not expressed in the heart, except for the residual expression carried over by  
143 neural crest cells that invade the arterial pole of the heart and promote aorticopulmonary  
144 septation [24]. The great vessels were excluded from our sample collection, and therefore  
145 cells of neural crest origin were likely not captured in the analyses. The fourth  
146 classification group was represented by kidney, expressing intermediate to high levels of  
147 most anterior *HOX* genes up to *HOX11*, consistent with previous observations for the  
148 developing kidney [25]. The fifth category, represented by the mouse tail, had a posterior  
149 *HOX* code signature, represented by *Hox13*, which correlates with previous findings for  
150 human distal segment fibroblasts, represented by feet skin fibroblasts [17, 18]. Taken  
151 together with previous observations, these analyses confirm that adult organ fibroblasts  
152 retain positional *HOX* gene expression signatures, generally reflecting the embryological  
153 segmental identity of organ fibroblasts.

### 154 Organ fibroblasts show unique molecular signatures

155 To highlight the unique transcriptomic signatures of these positionally distinct fibroblast  
156 pools, we performed a differential expression analysis and considered genes that were  
157 enriched by 10-fold change or more in single organ fibroblasts compared to tail fibroblasts  
158 (**Fig. 2, Supplementary Table 3**). Gene Ontology annotation revealed organ development  
159 programs; processes such as epithelial development, hepatoblast differentiation, lung lobe  
160 development, kidney development, reproductive process and heart development were

## *Fibroblast organ code*

161 found enriched in their respective organ fibroblast pools (**Fig. 2a**). Strikingly, signature  
162 embryonic transcription factors, i.e., genes with established involvement in organ  
163 development, were enriched in organ-specific subsets, including *Tbx20*, a crucial  
164 transcription factor for heart development previously described in cardiac fibroblasts [23].  
165 Likewise, genes essential for lung morphogenesis (*Foxf1*) [26], liver development (*Hhex*)  
166 [27], early kidney formation (*Pax8*) [28] and gonad development (*Lhx9*) [29] were all  
167 specifically enriched in fibroblasts from their respective organs. Expression of signature  
168 genes was validated by qPCR (**Fig. 2b, Supplementary Fig. 4**) and immunocytochemistry  
169 (**Fig. 3**). In general, signature gene expression patterns in embryonic fibroblasts were  
170 retained in fibroblasts from adult tissues (*Krt4*, *Krt6a*, *Serp1b5* and *Hp* for skin; *Tbx20*  
171 and *Col2a1* for heart; *Foxf1* for lung; *Hhex* and *Foxa2* for liver, *Bmp7* and *Pax8* for kidney,  
172 *Cyp11a1* and *Lbx9* for gonad). Significant expression of *Hhex* and *Bmp7* were also found  
173 in several organs during embryonic development but were restricted to a single organ in  
174 adulthood. As an exception to single organ enrichment, *Foxa2* was also substantially  
175 upregulated in lung fibroblasts (~20 fold), in addition to liver fibroblasts (~30 fold).

176 IPA analysis delineated top canonical pathways, diseases, functions and networks  
177 associated with selectively enriched genes in each fibroblast populations and supported the  
178 argument that fibroblasts retain molecular identity of their organ developmental origins  
179 (**Supplementary Figs. 5-10**). Among organ-related processes enriched in fibroblast  
180 subsets were dermatological diseases and conditions and morphogenesis of the epithelial  
181 tissue for skin fibroblasts (**Supplementary Fig. 5**), respiratory system development for  
182 lung fibroblasts (**Supplementary Fig. 6**), liver development for liver fibroblasts  
183 (**Supplementary Fig. 7**), acute renal failure, metanephros development and kidney  
184 formation, and abnormal kidney development, disease and function for kidney fibroblasts  
185 (**Supplementary Fig. 8**), reproductive system development, function and disease,  
186 morphology of genital organs and primary sex determination networks and reproductive  
187 system dysfunction for gonad fibroblasts (**Supplementary Fig. 9**), cardiovascular disease  
188 development and function, cardiac enlargement and disease and cardiac developmental  
189 processes for heart fibroblasts (**Supplementary Fig. 10**).

## *Fibroblast organ code*

190 To establish the translational relevance of our findings, the presence of 42 genes uniquely  
191 enriched in cardiac fibroblasts (log<sub>2</sub>, 10-fold, FDR <0.01) was determined in left  
192 ventricular heart biopsies from healthy (N=5) and chronic ischemic heart failure patients  
193 (N=5) (**Supplementary Fig. 10g, Table 4**). Ischemic heart failure was chosen for analysis  
194 due to the likelihood of replacement fibrosis as a pathological signature. Out of the 42  
195 murine cardiac fibroblast genes, 28 were present in both control and heart failure samples,  
196 including *Tbx20*, which was unchanged between control and heart failure. *FNDC1*, *FRZB*,  
197 *MFAP4* and *OLFML1* were significantly up-regulated in ischemic heart failure; while  
198 *MFSD2A*, *PNP* and *SERPINA3N* were down-regulated. Four genes had no human homolog  
199 and ten were not found in the human heart transcriptome dataset. These findings confirm  
200 commonalities across species and further identify potential candidates of fibrotic interest  
201 for future investigation.

### 202 Organ-enriched gene expression is retained at the single cell level in freshly isolated and 203 cultured fibroblasts

204 Single-cell RNA seq (scRNAseq) is a powerful tool to determine granularity of gene  
205 expression at the population level. To assess how organ signatures are reflected in freshly  
206 isolated fibroblasts, we re-analyzed the stromal cell dataset from a publicly available multi-  
207 organ single-cell RNA seq (scRNAseq) study (the Mouse Cell Atlas) [30]. Focusing on  
208 lung, testis, kidney, liver and neonatal heart cells, we unbiasedly identified 8 populations,  
209 including 3 lung and 2 kidney sub-clusters (**Fig. 4a**). Pairwise differential expression  
210 analysis supported a previously reported classification of lung fibroblasts populations [31],  
211 with two types of matrix fibroblasts - “LungA” (*Col14a1*, *Pil6*, *Dcn* enriched), “LungB”  
212 (*Coll3a1*, *Cxcl14*, *Tcf21* enriched)- and a group of myofibroblasts- “LungC” (*Acta2*, *Myl9*,  
213 *Tagln* positive) (**Supplementary Fig. 11 a-b**). For kidney clusters, “KidneyB” showed  
214 higher levels of canonical fibroblast markers *Dcn*, *Gsn* and *Colla2*, while the larger  
215 “KidneyA” expressed relatively higher levels of genes involved in response to injury, or in  
216 renal carcinoma metastasis and progression (*Spp1*, *Krt8*), suggesting that this cluster is  
217 composed of tubular cells acquiring a mesenchymal phenotype *in vivo* [32]  
218 (**Supplementary Fig. 11 c-d**), as kidney epithelial cells are known to undergo  
219 dedifferentiation *in vivo* and *in vitro* to repair tubular injuries [33, 34].



## *Fibroblast organ code*

220 Overall, the expression of organ-specific (**Fig. 4b**) and development-related genes (**Fig.**  
221 **4c**) previously identified in the bulk cultured cell analysis was preserved, despite the  
222 reduced coverage and expected heterogeneity at the single cell level (**Fig. 4b**).  
223 Interestingly, when multiple subclusters were present (as in lung and kidney fibroblasts)  
224 the expression of the organ-specific genes was enriched in myofibroblasts (Lung C  
225 expressed relatively higher levels of *Foxf1*) or activated fibroblasts (Kidney A, expressed  
226 higher levels of *Pax8* and *Wnt7b*) (**Fig. 4c, Table 5, Supplementary Fig. 11**).

227 Further confirmation of the organ enriched program was obtained with scRNAseq of  
228 pooled primary cultures from different origins (kidney, liver, lung, heart, skin, testis, tail)  
229 (**Fig. 4d**). Unbiased clustering defined Kidney 1-2, Lung, Heart 1-2, and Tail fibroblasts.  
230 Two additional clusters were unclassified based on organ identity, although marked by the  
231 expression of Hoxc genes (*HoxGenes*) and proliferation genes (*Prolif+HoxGenes*) (**Fig.**  
232 **4d-f, Table 6**). Highly expressed (**Fig. 4e**) and development-related genes (**Fig. 4f**) from  
233 original bulk analysis were again confirmed in these organ populations. Both cultured  
234 kidney clusters (Kidney 1-2) expressed the epithelial stress response marker (*Spp1*) and  
235 were transcriptionally closer to freshly isolated “KidneyA” (**Supplementary Fig. 12c**),  
236 possibly representing two stages of tubular cells epithelial-to-mesenchymal transition [35]:  
237 Kidney1 had higher expression of myofibroblast genes (*Col4a1, Tagln, Myl9, Sparc*) and  
238 the kidney-fibroblast-enriched gene *Pax8*; Kidney2 strongly expressed epithelial genes  
239 (*Krt7, 8, 18, Epcam, Clu*) (**Supplementary Fig. 12 d-e, table 6**). As for the cultured heart  
240 fibroblasts, Heart1 displayed myofibroblast genes (*Acta2, Tagln, Myl9*) and Heart2 had  
241 enhanced signature of injury response/ acutely activated fibroblasts (*Mt1, Ccl2, Clu, Dcn*)  
242 (**Supplementary Fig. 12 a-b, Table 6**) [22]. Overall, scRNAseq experiments showed that  
243 cultured cells present an activated/myofibroblast-like phenotype compared to freshly  
244 isolated cells and confirmed the retention of an organ-specific core transcriptome identity.

### 245 Organ enriched transcriptome is involved in the fibrotic response

246 To investigate the functional relevance of organ-enriched fibroblast transcriptomes, a  
247 CRISPR knock-down approach was used to down-regulate core organ transcription factors,  
248 taking the heart as a model (**Fig. 5**). *Rosa<sup>Cas9-GFP</sup>* [36] adult cardiac fibroblasts were co-  
249 transfected with mCherry mRNA and GFP guide RNAs for determination of transfection

*Fibroblast organ code*

250 and knock-down (KD) efficiency, respectively (**Fig. 5a**). After 72h of transfection,  
251 mCherry was observed in roughly 67% of cells (**Fig. 5b**) by flow cytometry, and GFP  
252 mRNA expression was downregulated by over 90% when compared with scrambled guides  
253 (negative control) (**Fig. 5c**). GFP fluorescence was also dramatically decreased by 72 hours  
254 (**Fig. 5a**) [37].

255 With this confirmation, *Gata4* and *Tbx20*, core transcription factors essential for heart  
256 formation in embryonic development [38], were knocked-down in cultured *Rosa<sup>Cas9-GFP</sup>*  
257 cardiac fibroblasts, followed by bulk RNA-seq analysis (**Fig. 5d-j**). *Gata4* is expressed by  
258 all organ fibroblasts while fibroblast *Tbx20* expression is restricted to the heart. Despite  
259 similar KD efficiencies for both targets (~60%; **Fig. 5d-e**), *Gata4KD* induced a higher  
260 number of dysregulated genes (red dots on volcano plots) compared with *Tbx20KD*.  
261 Among genes up-regulated by 10-fold in the original bulk organ analysis (eHF; **Fig. 5f-g**),  
262 9 were dysregulated by *Gata4KD* and 5 by *Tbx20KD*. Only 2 of these genes were  
263 dysregulated in both conditions, including *Tbx20*, suggesting *Gata4* as a possible upstream  
264 regulator of *Tbx20*. A number of genes showed opposite regulation between *Gata4KD* and  
265 *Tbx20KD* (**Fig. 5h**), confirming the specificity of KD response. These included cytokines  
266 and cytokine-receptors (*Il11*, *Tnfsf18*, *Ackr4*), genes involved in infection (*Ptgs2*, *Heyl*),  
267 cell adhesion and migration (*Spon2*, *Mmp10*). Of note, among the genes selectively  
268 upregulated in *Gata4KD*, *Il11* is a key mediator of organ fibrosis, possible downstream  
269 effector of TGF  $\beta$  [39]. Among genes upregulated in *Tbx20KD*, *Heyl*, downstream effector  
270 of Notch, is involved in cardiogenesis and is thought to repress *Gata4* expression [40],  
271 *Mmp10* is upregulated in patients with end-stage HF [41], and it is involved in valve  
272 ossification [42]. KEGG pathway analyses (**Fig. 5i, Supplementary table 7**) confirmed  
273 the involvement of *Gata4* and *Tbx20* in common but also diverse pathways. The top  
274 pathways uniquely up-regulated by *Gata4KD* included Akt signaling, ECM-receptor  
275 interaction and renin secretion, implicating *Gata4* in the modulation of cardiac fibroblast  
276 growth and ECM changes [43-45]. The top pathways up-regulated by *Tbx20KD* involved  
277 IL-17 and relaxin signaling, as well as transcription misregulation in cancer. IL17 has been  
278 shown to regulate the fibrotic response in pro-inflammatory conditions such as psoriasis  
279 and pulmonary/liver fibrosis [46-49], while relaxin has a well-established role in  
280 suppressing myofibroblast activation and ECM remodeling [50-52].

## *Fibroblast organ code*

281 In summary, both gene KDs affected matrix components and modulators (**Fig. 5j**), as well  
282 as cell adhesion, cell-cell communication and cell signaling genes. Markers of the  
283 epicardium, the external layer of the heart from which embryonic fibroblasts derive [53],  
284 were also modulated, as well as several myocardial genes, found in low levels in cardiac  
285 fibroblasts and downregulated in *Gata4KD*. These results confirm the biological relevance  
286 of organ-specific fibroblast gene expression.

### 287 Organ fibroblast specificity affects tissue function in co-culture systems

288 The studies described above confirmed that fibroblasts retain an organ-specific  
289 transcriptome from embryonic development to adulthood, and that their identities are  
290 largely maintained in cultured cells, suggesting that fibroblast transcriptomes may be  
291 important for *in vivo* organ function. To determine whether the source of organ fibroblast  
292 affects organ function, 2D and 3D co-cultures of cardiomyocytes (CMs) with adult kidney  
293 and cardiac fibroblasts were performed (**Fig. 6**).

294 For 2D cultures, neonatal ventricular CMs were plated with *Colla1-GFP+* fibroblasts from  
295 adult kidney or heart [54]. Within 24h, coculture with adult kidney fibroblasts almost  
296 completely impaired CM contractility (**Fig. 6b-c, Supplementary Video 1**), although the  
297 number of CMs present in both cultures was not significantly different. Conversely, cardiac  
298 fibroblast co-culture resulted in a syncytium of cells beating in synchronism  
299 (**Supplementary Video 2**) at a relatively lower pace than neonatal CMs alone (**Fig. 6c**),  
300 possibly reflecting an effect of adult HF on neonatal CM maturation [55]. In addition,  
301 cardiac fibroblasts were well integrated with neonatal CMs, as shown by the percentage of  
302 co-localization, while kidney fibroblasts and CMs seemed to repel each other. To confirm  
303 these findings, 3D cardiac microtissues we generated, as previously described [56, 57]. A  
304 suspension of 85% human induced pluripotent stem cell derived CMs (iCMs) and 15%  
305 adult cardiac or kidney fibroblasts was loaded on millitissue devices with pairs of  
306 cantilevers to generate force. As expected, cardiac fibroblasts were homogenously  
307 interspersed in the organoids, while kidney fibroblasts were aggregated to the center or  
308 periphery of the organoids (**Fig. 6d**), indicating lack of integration between the two cell  
309 types. These results implicate organ-specific fibroblasts in imparting their cognate tissue  
310 integrity.

311 Ectopically transplanted fibroblasts retain core transcriptional identity

312 To investigate if adult fibroblasts maintain their organ-specific signature when exposed to  
313 a different tissue microenvironment *in vivo*, fibroblasts from tail, heart and kidney of  
314 *ROSA<sup>mT/mG</sup>* mice were absorbed on surgical gel foam and transplanted under the kidney  
315 capsule of syngeneic C57BL6/J mice (**Fig. 7a**). Three days post-transplantation, kidneys  
316 were dissected and sorted (**Fig. 7b**) to determine transcriptional changes in transplanted  
317 cells. Transplanted heart (HF<sub>s</sub>), kidney (KF<sub>s</sub>), tail (TF<sub>s</sub>) fibroblasts, and corresponding *in*  
318 *vitro* cultured controls (HF<sub>c</sub>, KF<sub>c</sub>, TF<sub>c</sub>) were processed for bulk RNA-seq.  
319 Multidimensional scaling plot for all samples showed that the three organ fibroblast types  
320 retained a distinct identity post-transplant, despite a reduced transcriptomic separation  
321 (**Fig. 7c**).

322 To assess eventual changes in organ-specific identity, we compared the expression of  
323 sorted and cultured heart and kidney fibroblasts with the correspondent tail fibroblasts, and  
324 we analyzed the expression of heart-enriched (eHF) and kidney-enriched (eKF) genes  
325 identified from the initial bulk RNA analyses (**Supplementary Table 3, Figs. 5-10**). We  
326 observed that fibroblasts generally maintained their core identity after transplant. Of the 26  
327 genes enriched in HF<sub>c</sub>, 21 (80.7%) were similarly modulated in HF<sub>s</sub>, only 2 were  
328 downregulated and 3 were not detected (**Fig. 7d**). As expected, eHF gene expression was  
329 low or downregulated in KF<sub>c</sub> compared to TF<sub>c</sub> and kept a similar expression pattern post-  
330 transplant (**Fig. 7d**). Of the 47 eKF significantly expressed in KF<sub>c</sub>, 41 (87.2%) were  
331 modulated in the same direction in KF<sub>s</sub>, one gene was downregulated, and 5 genes were  
332 not detected. 26 (55.3%) eKF genes were also found in HF<sub>c</sub>, 17 mildly upregulated, 9  
333 downregulated. Of these, 14 were similarly regulated in HF<sub>s</sub>, one gene was not detected  
334 and 11 were differentially regulated (7 upregulated, 4 downregulated). An additional 13  
335 eKF genes were detected in HF<sub>s</sub>, all mildly upregulated except for 1 downregulated,  
336 showing an adaptation to the new microenvironment (**Fig. 7e**). Gene ontology (GO)  
337 analysis of KF or HF enriched genes in culture or post-transplant using *DAVID* (Database  
338 for Annotation, Visualization and Integrated Discovery [58]) revealed terms related to  
339 organ development, in line with the previous observations (**Fig. 7f-g**). The top GO terms  
340 for both HF<sub>c</sub> and HF<sub>s</sub> were related to cardiac morphogenesis and cardioblast  
341 differentiation; the top terms for KF<sub>c</sub> and KF<sub>s</sub> were related to mesonephros and

## *Fibroblast organ code*

342 metanephros development. In summary, both HFs and KFs maintained their core  
343 transcriptomic identity compared to TFs.

344

### 345 Ectopically transplanted fibroblasts adapt to a new microenvironment

346 To analyze the differential HF, KF, TF responses to the transplantation, gene expression of  
347 each post-transplant fibroblast type was compared with its equivalent control kept in  
348 culture. Despite the retention of organ identity signatures, numerous genes were modulated  
349 in transplanted fibroblasts compared to cultured controls (4082 genes for HFs/HFc, 3555  
350 for KFs/KFc, and 2750 for TFs/TFc) (**Fig. 7h**). These included 4-5 Hox genes per cell type,  
351 showing a modulation of the cell-type specific positional code. *Hoxa1* (the highest  
352 expressed in HFc) and *Hoxc13* were downregulated in all conditions (**Fig. 7i**). The tail-  
353 enriched *Hoxb13* was downregulated in TFs, while *Hoxa5* was increased. *Hoxd3* and  
354 *Hoxd8* were upregulated in both HFs and KFs; and *Hoxd10* was downregulated in KFs.  
355 Interestingly, *Hoxd8* is important for the maintenance of epithelial phenotype in adult  
356 kidney and is expressed in the ureteric bud during development [59], while *Hoxd10* is  
357 diffusely expressed in kidney mesenchyme in embryos; both *Hoxd10* and *Hoxd3* regulate  
358 *Itga3* expression and have been involved in different types of cancer [60]. The differential  
359 regulation of *Hoxd10* and *Hoxd3* may suggest the acquisition of a cortex-like phenotype  
360 by transplanted KFs.

361 KEGG analysis of the genes modulated in response to the transplant showed upregulation  
362 of pathways related to fibrosis and damage response (TNF signaling, ECM-receptor  
363 interaction, protein digestion and absorption) and downregulation of oxidative  
364 phosphorylation, steroid biosynthesis, and p53 signaling among the commonly regulated  
365 genes (**Fig. 7l, Supplementary Fig. 13a**). Genes uniquely upregulated in KFs/KFc were  
366 related to homologous recombination and cell cycle, with pathways including several  
367 histone genes (Alcoholism, Systemic lupus erythematosus, **Supplementary Fig. 13a**);  
368 those selectively upregulated in HFs/HFc were associated with cell migration (axon  
369 guidance), vasopressin regulated water absorption and lipid metabolism; and to pro-  
370 inflammatory pathways for TFs/TFc (TNF signaling, cytokine-receptor interactions,  
371 pathways in cancers) (**Fig. 7l**). Similarly, IPA analysis revealed that the most significantly  
372 affected Canonical Pathways were related to fibrosis (Hepatic fibrosis signaling, GP6

*Fibroblast organ code*

373 Signaling); cell migration (Axonal Guidance Signaling); acute phase response,  
374 inflammation and cholesterol biosynthesis (**Supplementary Fig. 13b**). Interestingly,  
375 Cardiac Hypertrophy Signaling (which include many pro-fibrotic signals like AngII,  
376 TGFb, IGF1), and HIF1a signaling were predicted to be downregulated in KFs and  
377 upregulated in HFs and TFs, possibly inferring a better resilience of KFs to the kidney  
378 capsule environment.

379 Among the top 10 upregulated genes in transplanted fibroblasts, 6 were shared by the  
380 ectopically transplanted HFs and TFs, including the serum amyloid A *Saa3*, secreted  
381 during the acute phase of inflammation[22]; two metabolic enzymes, *Slc27a2*, primarily  
382 expressed in kidney and liver involved in lipid biosynthesis and fatty acid degradation, and  
383 *Pck1* key regulator of gluconeogenesis; the cytochrome gene *Cy2j5* involved in  
384 vasorelaxation[61]; the kidney abundant protein *Kap*, androgen-regulated, proximal  
385 tubule-specific not expressed at detectable levels in tissue other than the kidney[62], *Fut9*  
386 a fucosyltransferase with the highest expression in adult pancreas, placenta, kidney (**Fig.**  
387 **7m**). In summary, while transplanted fibroblasts maintained their core identity, they  
388 responded to the kidney microenvironment by expressing a subset of kidney-specific  
389 genes, modulating positional code genes (i.e. *Hoxa1* for heart and *Hoxc13* for tail), and  
390 activating common and cell-specific pathways in the attempt to adapt to the new, more  
391 hypoxic condition.

392

393 **Discussion**

394 The ability to target specific organ fibroblasts has long been impaired by the misconception  
395 that fibroblasts were functionally and phenotypically homogeneous cells, deputized to  
396 synthesizing and organizing the extracellular matrix, an idea possibly fostered by a  
397 common embryonic origin in the primary mesenchyme [13]. Indeed, a recent study has  
398 shown that, despite apparent tissue-specific imprinting, fibroblasts subclusters across  
399 multiple organs present a common hierarchy, with two universal subtypes generating more  
400 specialized or activated fibroblasts states [63]. However, recent advances in lineage tracing  
401 and single-cell transcriptomic have revealed an extensive intra- and inter-organ  
402 heterogeneity [3, 13]. Multi-organ studies show that B-cells [64], endothelial cells [65],  
403 fibroblasts [21, 30] transcriptomes tend to cluster separately based on the organ of origin,  
404 thus putting into question the very concept of cell type. For fibroblasts isolated from  
405 muscular tissues, the organ-specific differences are considered to be mostly attributable to  
406 changes in the matrisome [21].

407 We previously reported that fibroblasts isolated from the adult mouse heart retain a  
408 cardiogenic transcriptional program [23]. Here, we compared primary cultures of  
409 fibroblasts isolated from organs of different anatomical positions to expand our previous  
410 analysis and assess whether development-related genes contribute to the fibroblasts' inter-  
411 organ functional heterogeneity. The results of this analysis highlight the presence of an  
412 organ-enriched positional code, and the expression of core genes that represent the  
413 developmental signature of fibroblast organ origin previously thought to be restricted to  
414 the parenchymal component. These molecular profiles are established during  
415 embryogenesis, reflecting the fact that organ fibroblasts are not generated from a common  
416 progenitor pool, but arise independently in different body segments and organs during  
417 embryonic development and persist to adulthood.

418 As in our previous study [23], we chose to analyze cultured fibroblasts to reduce the risk  
419 of contamination from parenchymal cell mRNA. Fibroblast expression patterns in culture  
420 were recapitulated in freshly isolated single cells, mostly enriched in activated or  
421 myofibroblast-like fibroblast subclusters. These gene signatures can predict the tissue of  
422 origin of a mixed population of primary cultured cells analyzed at the single-cell level.  
423 Using the heart as an example we show that signature genes contribute to organ fibroblast

## *Fibroblast organ code*

424 function, as evidenced by the deregulation of several pro-fibrotic and pro-inflammatory  
425 genes with knock-down of core transcription factors *Gata4* (expressed in all fibroblasts  
426 types) and *Tbx20* (cardiac-specific) in cultured adult cardiac fibroblasts. These results place  
427 *Gata4* upstream of *Tbx20*, both of which upregulate distinct pro-fibrotic signals, modulate  
428 genes involved in extra-cellular modulation and cell adhesion, and have opposite effects  
429 on cytokine-cytokine receptor expression, confirming that the core cardiogenic program in  
430 cardiac fibroblasts is involved in regulating their function.

431 Dermal fibroblasts from different sites of the body have shown different efficiency of  
432 reprogramming into induced pluripotent stem cells [66], but not much is known about other  
433 fibroblast tissue-specific functions. The co-culture studies presented here further reinforce  
434 the importance of fibroblast core transcriptomes for specialized organ function: while  
435 interspersed cardiac fibroblasts within CM cultures facilitated the propagation of the  
436 electric pulse forming a syncytium, co-cultured kidney fibroblasts clustered separately and  
437 inhibited CM contraction, both in 2D and 3D assays. These findings carry repercussions to  
438 *in silico* organ bioengineering, where combining the correct match of diverse organ cell  
439 types may be essential for proper organ formation. Indeed, human induced pluripotent stem  
440 cell derived cardiac stromal cells enhance maturation of cardiac microtissues [67]. In  
441 addition, the source and type of organ scaffolding, mainly deployed by fibroblasts, is  
442 essential for the re-creation of organs in a dish [68].

443 Previous studies have shown that skin fibroblasts and mesenchymal cells from different  
444 organs keep a positional identity [17-19]. For mesenchymal cells, the Hox code was  
445 maintained also in culture, although whether this depended on cell-to-cell contact remained  
446 to be determined [19]. Here we show that adult fibroblasts, isolated from a variety of  
447 organs, preserve the expression of Hox genes in culture, but that tissue-specific Hox genes  
448 were downregulated after ectopic transplantation under the kidney capsule, suggesting that  
449 cellular environment can induce reprogramming of positional codes. Interestingly, control  
450 kidney fibroblasts also presented changes in the Hox code after transplantation, possibly  
451 reflecting the adaptation to the space between the capsule and the cortex, with the decrease  
452 of the mesenchyme gene *Hoxd10* and increase of *Hoxd3* important for the maintenance of  
453 an epithelial phenotype in adult kidney. All three transplanted fibroblast types (heart, tail,  
454 kidney) presented an activated phenotype, involving initiation of the acute phase response,



*Fibroblast organ code*

455 pro-fibrotic signals, and metabolic changes. While transplanted heart and tail fibroblasts  
456 showed a clearer activation of pro-inflammatory pathways, genes associated with cell  
457 migration, and HIF1 $\alpha$  signaling; transplanted kidney fibroblasts appeared more resilient in  
458 their native milieu, with the activation of pathways related to proliferation and upregulation  
459 of genes indicative of a more epithelial cortex-like phenotype. Both heart and kidney  
460 fibroblasts retained a “memory” of their organ of origin, defined by the resilient expression  
461 of the core of development-related genes when compared to tail fibroblast control. It  
462 remains to be determined if this memory can be erased by a longer residence in the ectopic  
463 microenvironment. In light of recent studies on endothelial cells [69, 70], we propose that  
464 the expression of organ-specific genes, previously thought to be restricted to parenchymal  
465 cells, may form the basis for organ cohesiveness and performance.

466 In summary, adult fibroblasts maintain a lasting blueprint of the organ in which they reside,  
467 reflective of its developmental origin, which likely plays a role in the orchestration of the  
468 tissue-specific homeostasis and reparative response. Exploiting the organ-specific  
469 properties of fibroblasts may be a valuable strategy for the targeted control of organ  
470 fibrosis, an integral feature of organ failure and disease progression affecting a multitude  
471 of pathologies.

472

473

474 **Methods**

475 Mice

476 All experiments were performed with young adult (8-12 weeks old) C57BL/6J,  
477 Gt(ROSA)26Sor<sup>tm1.1(CAG-cas9\*,-EGFP)Fvzh/J</sup> (Rosa<sup>Cas9-EGFP</sup>), Rosa26<sup>mt/mg</sup> (JAX Stock#  
478 007576)[71], Coll1a1-GFP[72] male mice and Coll1a1-GFP embryos E16.5. All animal  
479 experimentation conformed with local (Jackson Laboratory) and national (NHMRC and  
480 NIH) guidelines, under IACUC protocol 16010.

481 Fibroblast isolation and sorting

482 Liver, heart, lung, kidney, tail, gonad and ventral skin of adult mice and E16.5 embryos  
483 were dissected and finely minced. Fibroblasts were isolated using enzymatic digestion with  
484 0.05% Trypsin/EDTA (Gibco) under agitation at 37°C for 40 minutes. Cells were spun and  
485 plated in 10cm dishes and cultured to semi-confluence in DMEM (ThermoFisher) high  
486 glucose supplemented with 10% FBS (ThermoFisher), sodium pyruvate and pen/strep  
487 (ThermoFisher) in a 5% CO<sub>2</sub> incubator at 37°C. Passage 0 cells were then trypsinized using  
488 Triple (ThermoFisher) and further processed for flow cytometry, labeled using CD90-  
489 AF647 (BioLegend), CD45-PeCy7 and CD31-Pe (eBioscience) in 2%FBS/HBSS  
490 (ThermoFisher) and sorted using Influx or Aria II Sorter (BD). The CD90+; CD45-; CD31-  
491 fraction was collected for mRNA isolation (**Supplementary Fig.1**). Adult fibroblasts from  
492 Rosa<sup>Cas9-EGFP</sup> and Coll1a1-GFP were sorted using CD90-APC (BioLegend), CD45-  
493 APCCy7(BioLegend), CD31-PECy7 (BD) after 3 or 5 days respectively.

494 Microarray Assay

495 Sorted organ fibroblasts were resuspended in cell lysis buffer, further processed for total  
496 RNA isolation using the RNAqueous Micro kit (ThermoFisher) and DNase digested on  
497 column. Fibroblasts from individual mice were used for each replicate. Triplicates or more  
498 were used for each organ. Samples were further processed by the Monash Health  
499 Translational Precinct Medical Genomics Facility and ran on Agilent SurePrint G3 mouse  
500 gene expression arrays (single color).

501 Bulk RNA sequencing

502 Total RNA was isolated from heart tissue using miRNeasy Mini kit (Qiagen); from cultured  
503 fibroblasts (CRISPR-experiment) and sorted fibroblasts (kidney capsule experiment),  
504 using RNeasy Micro kit (Qiagen) according to manufacturer instruction and including the

## *Fibroblast organ code*

505 optional DNase digest step. Sample concentration and quality were assessed using the  
506 Nanodrop 2000 spectrophotometer (Thermo Scientific) and the Total RNA Nano or Pico  
507 assays (Agilent Technologies).

508 For human heart samples, libraries were constructed using the KAPA RNA Hyper Prep Kit  
509 with RiboErase (HMR) (KAPA Biosystems), according to the manufacturer's instructions.

510 For cultured fibroblasts (CRISPR-experiment), libraries were constructed using the KAPA  
511 mRNA HyperPrep Kit (KAPA Biosystems), selecting polyA containing mRNA using  
512 oligo-dT magnetic beads, according to the manufacturer's instructions. For cells isolated  
513 from the kidney capsule, given the low RNA input, libraries were constructed using the  
514 SMARTer Stranded Total RNA-Seq Kit v2-Pico (Takara), according to the manufacturer's  
515 protocol.

516 All the libraries were checked for quality and concentration using the D5000 ScreenTape  
517 assay (Agilent Technologies) and quantitative PCR (KAPA Biosystems), according to the  
518 manufacturers' instructions; pooled and sequenced 75 bp paired-ended (human samples)  
519 or single-end (cultured and sorted fibroblasts) on the NextSeq 500 (Illumina).

### 520 Single cell RNA sequencing

521 Fibroblasts isolated from the different tissues were FAC-sorted and loaded onto a single  
522 channel of the 10X Genomics Chromium single cell platform. Briefly, cells were loaded  
523 for capture using the v2 single cell reagent kit. Following capture and lysis, cDNA was  
524 synthesized and amplified (14 cycles) as per manufacturer's protocol (10X Genomics). The  
525 amplified cDNA was used to construct an Illumina sequencing library and sequenced on a  
526 single lane of a HiSeq 4000.

### 527 Bioinformatics Analyses

528 For microarray experiments, data extraction and pre-processing were performed as  
529 described previously [73]. In brief, raw single-channel signals were extracted (Agilent  
530 Feature Extraction Software v.11.0.1.1), and quality control was performed using the  
531 default "Compromised" option in (GeneSpring GX v.12.6), with threshold raw signal of  
532 1.0. The approximate mean of 24 samples  $\times$  ~55,000 probes (10,000) was used as a natural  
533 threshold between high-intensity probes and low-intensity probes. If several probes  
534 represented a single gene, the mean of these probes was used. Probes that could not be  
535 mapped to any gene were discarded. Log-2 transformation and quantile normalization was

## *Fibroblast organ code*

536 done using R scripts and public Bioconductor packages. Differential analysis was  
537 performed using the Bioconductor *limma* package, which fits a linear model to the gene  
538 expression data, revealing the differential expression patterns (Benjamini-Hochberg  
539 adjusted p-value<0.05 and fold-change >2). These genes were extracted from the  
540 transcriptome to generate a heat-map together with hierarchical clustering dendrograms  
541 using MultiExperiment Viewer (MeV) [74]. Differentially expressed genes showing more  
542 than 10-fold change in any given organ were retrieved and an interaction file listing in  
543 which organs these genes were enriched was constructed. The interaction file was used as  
544 input for Cytoscape [75] in order to reconstruct the network of genes shared by two or more  
545 organs, or only specifically enriched in one organ. The network layout was constructed  
546 using a Spring Embedded layout and MeV. Gene Ontology over-representations for the  
547 organ-specific subset of genes was performed using the Cytoscape Bingo plug-in.  
548 Ingenuity Pathway Analysis was performed using the IPA software (Qiagen).

549 For single cell RNA sequencing analyses of freshly isolated fibroblasts, stromal cell data  
550 from the Mouse Cell Atlas [30] were kindly provided by Dr. Guoji Guo and Dr. Huiyu  
551 Sun. The data were re-analyzed using Seurat v3 [76]. Cell with less than 200 and more than  
552 2500 transcripts were filtered out. Out of the original aggregate, containing 21 samples and  
553 4830 cells, 5 populations of interested were selected for further analysis: "Lung", "Testis",  
554 "Kidney", "Liver", "NeonatalHeart", corresponding to 682 cells. Data were natural-log  
555 normalized and scaled using the top-2000 most variables features in the raw data. Principal  
556 component analysis (PCA) dimensionality reduction was calculated on 50 principal  
557 components; the Uniform Manifold Approximation and Projection (UMAP) dimensional  
558 reduction was calculated on 24 dimensions; cluster determination was performed using  
559 shared nearest neighbor (SNN) at a 0.5 resolution. Cluster's markers genes were identified  
560 with the *FindAllMarkers* function, using the default Wilcoxon Rank Sum test, at a  
561 threshold of 0.25 and a minimum difference in the fraction of detection (*min.diff.pct*) of  
562 0.3. Pairwise comparisons were done using the *FindMarkers* function, with MAST assay  
563 and only testing genes that are detected in 25% of cells in either of the two populations  
564 (*min.pct*=0.25).

565 For bulk RNAseq analysis on cultured fibroblasts post- CRISPR-Cas9 knock down or  
566 kidney capsule implant: Single end, Illumina-sequenced stranded RNA-Seq reads were

## *Fibroblast organ code*

567 filtered and trimmed for quality scores > 30 using a custom python script. The filtered reads  
568 were aligned to *Mus musculus* GRCm38 using RSEM (v1.2.12) which performed  
569 alignment using Bowtie2 (v2.2.0) (command: `rsem-calculate-expression -p 12 --phred33-`  
570 `quals --seed-length 25 --forward-prob 0 --time --output-genome-bam -- bowtie2`). RSEM  
571 calculates expected counts and transcript per million (TPM). The expected counts values  
572 from RSEM were used in the edgeR 3.20.9 package to determine differentially expressed  
573 (DE) genes (based on fold-change > 1 and FDR < 0.05).

574 For single cell RNA sequencing data from cultured fibroblasts, Illumina basecall files  
575 (\*.bcl) were converted to FASTQ files using Cell Ranger v1.3, using the command-line  
576 tool *bcl2fastq* v2.17.1.14. FASTQ files were then aligned to mm10 genome and  
577 transcriptome using the Cell Ranger v1.3 pipeline, which generates a gene vs cell  
578 expression matrix. The data were analyzed using Seurat v3 [76] using the same pipeline  
579 and parameters as described above, unless stated below. Given the high average number of  
580 features, cell with less than 200 and more than 8500 transcripts were filtered out, obtaining  
581 1121 cells. Data were normalized and scaled as described above. PCA dimensionality  
582 reduction was calculated on 50 principal components; UMAP dimensional reduction was  
583 calculated on 28 dimensions (value chosen based on the *ElbowPlot* of the standard  
584 deviations of the principal components).

### 585 qPCR

586 cDNA synthesis of RNAs used for the microarray was performed using the Superscript  
587 VILO kit (Invitrogen) following manufacturer's instructions. PCR reactions were  
588 performed using GoTaq Green master mix (Promega). qPCR reactions were performed  
589 using SYBR green master mix (Roche) and analyzed using the LightCycler 480 (Roche).  
590 At least 2 individual experiments in triplicate were performed. We tested several primers  
591 for endogenous control (*Tbp*, *Gapdh*, *L13*, *Ppi*, *Actab* and *Hprt*) and chose *Hprt* for further  
592 experiments due to its consistent reproducibility within and among samples  
593 (**Supplementary Fig. 1**). Primers are described in **Supplementary Table 8**. All PCR  
594 reactions were performed in triplicates and repeated at least twice per sample. Standard  
595 error of the mean is represented in all graphs. Prism v7.0 was used for the generation of  
596 graphs and statistics.

### 597 Neonatal mouse cardiomyocyte isolation

## *Fibroblast organ code*

598 The protocol from neonatal cardiomyocytes isolation was adapted from Argentin S. et  
599 al[77]. Hearts were collected from litters of 1-3days old pups, cut open and transferred to  
600 trypsin (1mg/ml in HBBS pH6.4) for overnight digestion at 4°C. The next day, hearts were  
601 subjected to 3 x 5min digestions with Collagenase II (1mg/10ml; Worthington). The cell  
602 suspension was collected in DMEM containing 10% fetal calf serum (FCS) and passed  
603 through a 100um cell strainer. After 5min centrifugation at 1000rpm, cells were plated in  
604 10cm dishes. Two rounds 1-hour pre-plating were done to remove cells highly adherent to  
605 plastic such as fibroblasts, before seeding the cell suspension on plates coated with 1:200  
606 fibronectin (ThermoFisher) in 0.1%gelatin (ThermoFisher).

### 607 2D Co-cultures

608 Adult fibroblasts isolated from heart or kidney of Col1a1-GFP mice were cultured to semi-  
609 confluence for 3-5-days, after which they were resuspended and co-cultured with mouse  
610 neonatal cardiomyocytes at a 4:1 ratio. After 24h, media was changed to DMEM containing  
611 2% FCS, videos were recorded, and cells were imaged with an Eclipse Ts2 inverted  
612 fluorescence microscope (Zeiss) and fixed with 4%PFA for 10min at 4 °C for further  
613 staining.

### 614 Cardiac Microtissues

615 Cardiac Microtissues were generated as previously described[56, 57], using  
616 polydimethylsiloxane (PDMS) 3D microarrays with 24 microwells containing cantilevers.  
617 A suspension of 1.3 million cells, 85% hiPSCs derived Cardiomyocytes (iCM) and 15%  
618 cardiac or kidney fibroblasts, was loaded on each device and cells were seeded in each well  
619 by centrifugation. 2 millitissue devices were used per fibroblasts type. The organoids were  
620 imaged and fixed 3 days post-production with 4%PFA for 15 min at RT. Only tissues  
621 uniformly anchored to the tips of the cantilevers were included in further analysis.

### 622 Immunostaining

623 A solution containing 2% bovine serum albumin (BSA), 2%FCS, 0.1% triton in PBS was  
624 used for permeabilization, blocking and dilution. Primary antibodies used in this study are:  
625 KRT14 (MA5-11599, ThermoFisher, 1:100), TBX20 (MAB8124, Novus Biologicals,  
626 1:200), FOXA2 (ab108422, Abcam, 1:300), HHEX (MAB83771, R&D System, 1:100),  
627 FOXD1 (TA322737, OriGene, 1:50) PAX8 (NBP2-29903, Novus Biological, 1:100), TNT  
628 (RC-C2, DSHB 1:200). Cells were stained overnight at 4 °C, washed in PBS and incubated

## *Fibroblast organ code*

629 1h with 1:500 secondary antibodies (Alexa Donkey anti Goat 568 - A11057, Goat anti  
630 Mouse 568 - A11031, Goat anti Rabbit 555 -A27017; ThermoFisher). Nuclei were  
631 counterstained with 0.1 $\mu$ g/ml DAPI (D1306, ThermoFisher).

632 For the immunostaining of Cardiac Microtissues, blocking and permeabilization were  
633 achieved with 0.1%Triton, 1% BSA in PBS (PBS-T-BSA) for 8 hours. The same solution  
634 was used to dilute primary antibodies: TNT (RC-C2, DSHB 1:200) or MF20 (DSHB  
635 1:100). Staining was performed overnight under gentle agitation at 4°C. After 3 x 5 min  
636 washes in PBS-T-BSA, microtissues were stained with secondary antibody and DAPI for  
637 1h at room temperature. After staining, the PDMS devices were pulled out of the 35mm  
638 dish used as support and flipped on glass coverslip for confocal imaging.

### 639 Imaging

640 Immunofluorescence images were acquired using either the either the upright fluorescent  
641 microscope Axio Imager.Z2 (Zeiss) or the SP8 confocal microscope equipped with a White  
642 Light Laser (Leica). For the cardiac microtissues, 3-4 tiles and 20-34 z stacks were imaged  
643 per sample. Tiles were combined using the LeicaX confocal software. Z-Stack projections  
644 and analysis were performed using Fiji version 1.0 and Imaris 8.4.1.

### 645 Cell transfection and CRISPR knock-down

646 Cardiac fibroblasts from Rosa<sup>Cas9-EGFP</sup> mice were transfected with guide RNAs using  
647 Lipofectamine MessengerMAX (ThermoFisher) according to manufacturer's instructions.  
648 Briefly, 3 days post-isolation, CD45-CD31-CD90+ cells were FACS sorted and re-plated  
649 at about 10,000cells/cm<sup>2</sup>. After 6 days, when reaching 80-90% confluency, cells were  
650 incubated for 5' with the RNA(1:50) -lipid(1:33) complex in Opti-MEM for 10' at room  
651 temperature. Media was changed after 48h and cells were collected for RNA isolation at  
652 72h. Two guide RNAs, designed and synthesized in-house (JAX Genetic Engineering  
653 Technologies facility), were used for each of the target genes (**Supplementary Table 7**).  
654 CleanCap® mCherry mRNA (TriLink Biotechnologies), and guide RNAs for GFP and  
655 scrambled guides were used as a controls. Guide RNA for the GFP gene were same as in  
656 [37].

### 657 Cell transplantation in the kidney capsule

658 Adult fibroblasts from heart, tail and kidney were isolated from 10 weeks old Rosa<sup>mT/mG</sup>  
659 male mice as described above. After ten days cells were collected, counted and 4-5x10<sup>5</sup>

*Fibroblast organ code*

660 cells were transferred in individual 1.5ml Eppendorf tubes (one per each kidney transplant),  
661 resuspended in 15-20ul of saline solution and kept on ice, until ready for the surgery. The  
662 remaining cells were re-plated ( $5 \times 10^4$ /well of a mw6 plate) for the cultured cells controls.  
663 Syngeneic 10-11weeks old C57bl6/j mice were used for the surgeries. Mice were  
664 anesthetized with Tribromoethanol 400 mg/kg injected intraperitoneally. In the meanwhile,  
665 the cell suspension was spotted on a petri dish and fragments of sterile absorbable gelatin  
666 foam (Surgifoam, Ethicon), about 1mm long, were immersed in the drop.

667 Fur was removed from the left flank of the animal and eye ointment was applied. The  
668 mouse was placed in right lateral recumbency and a drape positioned over the surgical site.  
669 A 6-9 mm skin incision was made parallel and ventral to the spine and midway between  
670 the last rib and the iliac crest. A similar incision was made in the underlying abdominal  
671 wall. The kidney was externalized by placing forceps under the caudal pole and gently  
672 lifting through the incision and kept moist with warm sterile saline. A small incision was  
673 made in the capsule over the caudal-lateral aspect of the kidney, and a shallow subcapsular  
674 pocket was made with a blunt probe advanced toward the cranial pole of the kidney. The  
675 foam previously soaked in the cell suspension was placed in the far end of the subcapsular  
676 pocket. If needed, additional foam was used to close the incision site. Absorbable undyed  
677 6.0 Vicryl sutures (Ethicon) were used to close the abdominal wall, 6.0 Vicryl black sutures  
678 (Ethicon) for the skin. Bupivacaine 0.1% was applied topically on the injection site and  
679 Slow-Release buprenorphine 0.05mg/kg was injected subcutaneously.

680 **Data availability:** All transcriptome data that support the findings of this study are  
681 available in Gene Expression Omnibus (GEO) with the identifiers GSE98783 for  
682 microarray and SRR5590304 for single cell RNA sequencing. All other bulk RNAseq  
683 datasets generated for the CRISPR-experiment, kidney capsule transplant experiment and  
684 human cardiac biopsies comparison are available in GEO with the identifier GSE175765.

685 **Acknowledgements:** We gratefully acknowledge the contribution of Luis E. Lima, Heidi  
686 Munger, Dr. Philipp Heinrich, and the Genome technology, Single Cell, Light Microscopy,  
687 Flow cytometry Services at The Jackson Laboratory for expert assistance with the work  
688 described in this publication.

689 This work is supported by grants from the Australian Research Council (ARC) and the  
690 National Health and Medical Research Council (NHMRC) to NAR, MWdC, MR, and



*Fibroblast organ code*

691 NHMRC/Heart Foundation Fellowship to MR; and by the JAX Director's Innovation  
692 Fund, and the NIH/NIGMS (2 P20 GM104318), the NIH/NIA (5 U01 AG022308-17), and  
693 grant from the Leducq Foundation for Cardiovascular Research to NR. The Australian  
694 Regenerative Medicine Institute is supported by grants from the State Government of  
695 Victoria and the Australian Government. The Jackson Laboratory scientific services are  
696 supported by the NIH/NCI (5 P30 CA034196).

697  
698 **Author contributions:** Conceptualization- MBF, EF, MR, HTN, NAR; Investigation- EF,  
699 MM, RC, SD, MWC; Data Curation- MBF, EF, MR, HTN, MWC; Formal analysis- MBF,  
700 EF, MR, HTN, MWC; Methodology- MBF, EF; Funding acquisition- MBF, EF, MR,  
701 HTN, NAR; Supervision- SB, TH; Project administration- MBF, EF; Manuscript writing  
702 MBF, EF, MR, HTN, NAR.

703  
704 **Competing financial interests:** the authors declare no conflict of interests.

705

706 **Materials and correspondence:** all material requests and correspondence should be  
707 directed to the corresponding author.

708

709 **References:**

- 710 1. Bitterman, P.B. and C.A. Henke, *Fibroproliferative disorders*. Chest, 1991. **99**(3  
711 Suppl): p. 81S-84S.
- 712 2. Friedman, S.L., et al., *Therapy for fibrotic diseases: nearing the starting line*. Sci  
713 Transl Med, 2013. **5**(167): p. 167sr1.
- 714 3. Henderson, N.C., F. Rieder, and T.A. Wynn, *Fibrosis: from mechanisms to*  
715 *medicines*. Nature, 2020. **587**(7835): p. 555-566.
- 716 4. Gerber, T., et al., *Single-cell analysis uncovers convergence of cell identities*  
717 *during axolotl limb regeneration*. Science, 2018. **362**(6413).
- 718 5. Pakshir, P., et al., *The myofibroblast at a glance*. J Cell Sci, 2020. **133**(13).
- 719 6. Van Linthout, S., K. Miteva, and C. Tschöpe, *Crosstalk between fibroblasts and*  
720 *inflammatory cells*. Cardiovasc Res, 2014. **102**(2): p. 258-69.
- 721 7. Forte, E., M.B. Furtado, and N. Rosenthal, *The interstitium in cardiac repair: role*  
722 *of the immune-stromal cell interplay*. Nat Rev Cardiol, 2018. **15**(10): p. 601-  
723 616.
- 724 8. Boyd, D.F., et al., *Exuberant fibroblast activity compromises lung function via*  
725 *ADAMTS4*. Nature, 2020. **587**(7834): p. 466-471.
- 726 9. Krausgruber, T., et al., *Structural cells are key regulators of organ-specific*  
727 *immune responses*. Nature, 2020. **583**(7815): p. 296-302.
- 728 10. Swonger, J.M., et al., *Genetic tools for identifying and manipulating fibroblasts*  
729 *in the mouse*. Differentiation, 2016. **92**(3): p. 66-83.
- 730 11. Shaw, T.J. and E. Rognoni, *Dissecting Fibroblast Heterogeneity in Health and*  
731 *Fibrotic Disease*. Curr Rheumatol Rep, 2020. **22**(8): p. 33.
- 732 12. Lynch, M.D. and F.M. Watt, *Fibroblast heterogeneity: implications for human*  
733 *disease*. J Clin Invest, 2018. **128**(1): p. 26-35.
- 734 13. LeBleu, V.S. and E.G. Neilson, *Origin and functional heterogeneity of fibroblasts*.  
735 FASEB J, 2020. **34**(3): p. 3519-3536.
- 736 14. Griffin, M.F., et al., *Understanding the impact of fibroblast heterogeneity on skin*  
737 *fibrosis*. Dis Model Mech, 2020. **13**(6).
- 738 15. Slany, A., et al., *Plasticity of fibroblasts demonstrated by tissue-specific and*  
739 *function-related proteome profiling*. Clin Proteomics, 2014. **11**(1): p. 41.
- 740 16. Foote, A.G., et al., *Tissue specific human fibroblast differential expression based*  
741 *on RNAsequencing analysis*. BMC Genomics, 2019. **20**(1): p. 308.
- 742 17. Rinn, J.L., et al., *Anatomic demarcation by positional variation in fibroblast gene*  
743 *expression programs*. PLoS Genet, 2006. **2**(7): p. e119.
- 744 18. Rinn, J.L., et al., *A dermal HOX transcriptional program regulates site-specific*  
745 *epidermal fate*. Genes Dev, 2008. **22**(3): p. 303-7.
- 746 19. Ackema, K.B. and J. Charite, *Mesenchymal stem cells from different organs are*  
747 *characterized by distinct topographic Hox codes*. Stem Cells Dev, 2008. **17**(5):  
748 p. 979-91.
- 749 20. Chang, H.Y., et al., *Diversity, topographic differentiation, and positional memory*  
750 *in human fibroblasts*. Proc Natl Acad Sci U S A, 2002. **99**(20): p. 12877-82.
- 751 21. Muhl, L., et al., *Single-cell analysis uncovers fibroblast heterogeneity and criteria*  
752 *for fibroblast and mural cell identification and discrimination*. Nat Commun,  
753 2020. **11**(1): p. 3953.

*Fibroblast organ code*

- 754 22. Forte, E., et al., *Dynamic Interstitial Cell Response during Myocardial Infarction*  
755 *Predicts Resilience to Rupture in Genetically Diverse Mice*. Cell Rep, 2020. **30**(9):  
756 p. 3149-3163 e6.
- 757 23. Furtado, M.B., et al., *Cardiogenic genes expressed in cardiac fibroblasts*  
758 *contribute to heart development and repair*. Circ Res, 2014. **114**(9): p. 1422-  
759 34.
- 760 24. Kirby, M.L., T.F. Gale, and D.E. Stewart, *Neural crest cells contribute to normal*  
761 *aorticopulmonary septation*. Science, 1983. **220**(4601): p. 1059-61.
- 762 25. Patterson, L.T. and S.S. Potter, *Atlas of Hox gene expression in the developing*  
763 *kidney*. Dev Dyn, 2004. **229**(4): p. 771-9.
- 764 26. Costa, R.H., V.V. Kalinichenko, and L. Lim, *Transcription factors in mouse lung*  
765 *development and function*. Am J Physiol Lung Cell Mol Physiol, 2001. **280**(5): p.  
766 L823-38.
- 767 27. Keng, V.W., et al., *Homeobox gene Hex is essential for onset of mouse embryonic*  
768 *liver development and differentiation of the monocyte lineage*. Biochem Biophys  
769 Res Commun, 2000. **276**(3): p. 1155-61.
- 770 28. Bouchard, M., et al., *Nephric lineage specification by Pax2 and Pax8*. Genes Dev,  
771 2002. **16**(22): p. 2958-70.
- 772 29. Birk, O.S., et al., *The LIM homeobox gene Lhx9 is essential for mouse gonad*  
773 *formation*. Nature, 2000. **403**(6772): p. 909-13.
- 774 30. Han, X., et al., *Mapping the Mouse Cell Atlas by Microwell-Seq*. Cell, 2018.  
775 **173**(5): p. 1307.
- 776 31. Xie, T., et al., *Single-Cell Deconvolution of Fibroblast Heterogeneity in Mouse*  
777 *Pulmonary Fibrosis*. Cell Rep, 2018. **22**(13): p. 3625-3640.
- 778 32. Rudman-Melnick, V., et al., *Single-Cell Profiling of AKI in a Murine Model Reveals*  
779 *Novel Transcriptional Signatures, Profibrotic Phenotype, and Epithelial-to-*  
780 *Stromal Crosstalk*. J Am Soc Nephrol, 2020. **31**(12): p. 2793-2814.
- 781 33. Kusaba, T., et al., *Differentiated kidney epithelial cells repair injured proximal*  
782 *tubule*. Proc Natl Acad Sci U S A, 2014. **111**(4): p. 1527-32.
- 783 34. Van der Hauwaert, C., et al., *Isolation and characterization of a primary*  
784 *proximal tubular epithelial cell model from human kidney by CD10/CD13 double*  
785 *labeling*. PLoS One, 2013. **8**(6): p. e66750.
- 786 35. Iwano, M., et al., *Evidence that fibroblasts derive from epithelium during tissue*  
787 *fibrosis*. J Clin Invest, 2002. **110**(3): p. 341-50.
- 788 36. Platt, R.J., et al., *CRISPR-Cas9 knockin mice for genome editing and cancer*  
789 *modeling*. Cell, 2014. **159**(2): p. 440-55.
- 790 37. Li, K., et al., *Optimization of genome engineering approaches with the*  
791 *CRISPR/Cas9 system*. PLoS One, 2014. **9**(8): p. e105779.
- 792 38. Nim, H.T., et al., *VISIONET: intuitive visualisation of overlapping transcription*  
793 *factor networks, with applications in cardiogenic gene discovery*. BMC  
794 Bioinformatics, 2015. **16**: p. 141.
- 795 39. Schafer, S., et al., *IL-11 is a crucial determinant of cardiovascular fibrosis*.  
796 Nature, 2017. **552**(7683): p. 110-115.
- 797 40. Fischer, A., et al., *Hey basic helix-loop-helix transcription factors are repressors*  
798 *of GATA4 and GATA6 and restrict expression of the GATA target gene ANF in fetal*  
799 *hearts*. Mol Cell Biol, 2005. **25**(20): p. 8960-70.

*Fibroblast organ code*

- 800 41. Wei, Y., et al., *Type-specific dysregulation of matrix metalloproteinases and their*  
801 *tissue inhibitors in end-stage heart failure patients: relationship between MMP-*  
802 *10 and LV remodelling.* J Cell Mol Med, 2011. **15**(4): p. 773-82.
- 803 42. Matilla, L., et al., *A Role for MMP-10 (Matrix Metalloproteinase-10) in Calcific*  
804 *Aortic Valve Stenosis.* Arterioscler Thromb Vasc Biol, 2020. **40**(5): p. 1370-  
805 1382.
- 806 43. Brilla, C.G., et al., *Hormonal regulation of cardiac fibroblast function.* Eur Heart  
807 J, 1995. **16 Suppl C**: p. 45-50.
- 808 44. Li, J., et al., *Rictor/mTORC2 signaling mediates TGFbeta1-induced fibroblast*  
809 *activation and kidney fibrosis.* Kidney Int, 2015. **88**(3): p. 515-27.
- 810 45. Dai, J., et al., *Negative regulation of PI3K/AKT/mTOR axis regulates fibroblast*  
811 *proliferation, apoptosis and autophagy play a vital role in triptolide-induced*  
812 *epidural fibrosis reduction.* Eur J Pharmacol, 2019. **864**: p. 172724.
- 813 46. Lei, L., et al., *Th17 cells and IL-17 promote the skin and lung inflammation and*  
814 *fibrosis process in a bleomycin-induced murine model of systemic sclerosis.* Clin  
815 Exp Rheumatol, 2016. **34 Suppl 100**(5): p. 14-22.
- 816 47. Zhang, J., et al., *Profibrotic effect of IL-17A and elevated IL-17RA in idiopathic*  
817 *pulmonary fibrosis and rheumatoid arthritis-associated lung disease support a*  
818 *direct role for IL-17A/IL-17RA in human fibrotic interstitial lung disease.* 2019.  
819 **316**(3): p. L487-L497.
- 820 48. Seki, E. and D.A. Brenner, *Recent advancement of molecular mechanisms of liver*  
821 *fibrosis.* J Hepatobiliary Pancreat Sci, 2015. **22**(7): p. 512-8.
- 822 49. Blauvelt, A. and A. Chiricozzi, *The Immunologic Role of IL-17 in Psoriasis and*  
823 *Psoriatic Arthritis Pathogenesis.* Clin Rev Allergy Immunol, 2018. **55**(3): p. 379-  
824 390.
- 825 50. Ng, H.H., et al., *Relaxin and extracellular matrix remodeling: Mechanisms and*  
826 *signaling pathways.* Mol Cell Endocrinol, 2019. **487**: p. 59-65.
- 827 51. Martin, B., et al., *Relaxin reverses maladaptive remodeling of the aged heart*  
828 *through Wnt-signaling.* Sci Rep, 2019. **9**(1): p. 18545.
- 829 52. Samuel, C.S., et al., *Anti-fibrotic actions of relaxin.* Br J Pharmacol, 2017.  
830 **174**(10): p. 962-976.
- 831 53. Quijada, P., M.A. Trembley, and E.M. Small, *The Role of the Epicardium During*  
832 *Heart Development and Repair.* Circ Res, 2020. **126**(3): p. 377-394.
- 833 54. Kanisicak, O., et al., *Genetic lineage tracing defines myofibroblast origin and*  
834 *function in the injured heart.* Nat Commun, 2016. **7**: p. 12260.
- 835 55. Wang, Y., et al., *Single-cell analysis of murine fibroblasts identifies neonatal to*  
836 *adult switching that regulates cardiomyocyte maturation.* Nat Commun, 2020.  
837 **11**(1): p. 2585.
- 838 56. Boudou, T., et al., *A microfabricated platform to measure and manipulate the*  
839 *mechanics of engineered cardiac microtissues.* Tissue Eng Part A, 2012. **18**(9-  
840 10): p. 910-9.
- 841 57. Hinson, J.T., et al., *HEART DISEASE. Titin mutations in iPS cells define sarcomere*  
842 *insufficiency as a cause of dilated cardiomyopathy.* Science, 2015. **349**(6251):  
843 p. 982-6.
- 844 58. Dennis, G., Jr., et al., *DAVID: Database for Annotation, Visualization, and*  
845 *Integrated Discovery.* Genome Biol, 2003. **4**(5): p. P3.

*Fibroblast organ code*

- 846 59. Di-Poi, N., J. Zakany, and D. Duboule, *Distinct roles and regulations for HoxD*  
847 *genes in metanephric kidney development*. PLoS Genet, 2007. **3**(12): p. e232.
- 848 60. Hua, X., et al., *Single-Cell RNA Sequencing to Dissect the Immunological Network*  
849 *of Autoimmune Myocarditis*. Circulation, 2020. **142**(4): p. 384-400.
- 850 61. Agba, S., et al., *Cyp2j5-Gene Deletion Affects on Acetylcholine and Adenosine-*  
851 *Induced Relaxation in Mice: Role of Angiotensin-II and CYP-Epoxygenase*  
852 *Inhibitor*. Front Pharmacol, 2020. **11**: p. 27.
- 853 62. Toole, J.J., N.D. Hastie, and W.A. Held, *An abundant androgen-regulated mRNA*  
854 *in the mouse kidney*. Cell, 1979. **17**(2): p. 441-8.
- 855 63. Buechler, M.B., et al., *Cross-tissue organization of the fibroblast lineage*. Nature,  
856 2021.
- 857 64. Rocha-Resende, C., et al., *Developmental changes in myocardial B cells mirror*  
858 *changes in B cells associated with different organs*. JCI Insight, 2020. **5**(16).
- 859 65. Paik, D.T., et al., *Single-Cell RNA Sequencing Unveils Unique Transcriptomic*  
860 *Signatures of Organ-Specific Endothelial Cells*. Circulation, 2020. **142**(19): p.  
861 1848-1862.
- 862 66. Sacco, A.M., et al., *Diversity of dermal fibroblasts as major determinant of*  
863 *variability in cell reprogramming*. J Cell Mol Med, 2019. **23**(6): p. 4256-4268.
- 864 67. Giacomelli, E., et al., *Human-iPSC-Derived Cardiac Stromal Cells Enhance*  
865 *Maturation in 3D Cardiac Microtissues and Reveal Non-cardiomyocyte*  
866 *Contributions to Heart Disease*. Cell Stem Cell, 2020. **26**(6): p. 862-879 e11.
- 867 68. Taylor, D.A., R.B. Parikh, and L.C. Sampaio, *Bioengineering Hearts: Simple yet*  
868 *Complex*. Curr Stem Cell Rep, 2017. **3**(1): p. 35-44.
- 869 69. Yucel, N., et al., *Cardiac endothelial cells maintain open chromatin and*  
870 *expression of cardiomyocyte myofibrillar genes*. Elife, 2020. **9**.
- 871 70. Jambusaria, A., et al., *Endothelial heterogeneity across distinct vascular beds*  
872 *during homeostasis and inflammation*. Elife, 2020. **9**.
- 873 71. Muzumdar, M.D., et al., *A global double-fluorescent Cre reporter mouse*. Genesis,  
874 2007. **45**(9): p. 593-605.
- 875 72. Yata, Y., et al., *DNase I-hypersensitive sites enhance alpha1(I) collagen gene*  
876 *expression in hepatic stellate cells*. Hepatology, 2003. **37**(2): p. 267-76.
- 877 73. Furtado, M.B., et al., *Microarray profiling to analyse adult cardiac fibroblast*  
878 *identity*. Genom Data, 2014. **2**: p. 345-50.
- 879 74. Saeed, A.I., et al., *TM4: a free, open-source system for microarray data*  
880 *management and analysis*. Biotechniques, 2003. **34**(2): p. 374-8.
- 881 75. Shannon, P., et al., *Cytoscape: a software environment for integrated models of*  
882 *biomolecular interaction networks*. Genome Res, 2003. **13**(11): p. 2498-504.
- 883 76. Stuart, T., et al., *Comprehensive Integration of Single-Cell Data*. Cell, 2019.  
884 **177**(7): p. 1888-1902 e21.
- 885 77. Argentin, S., et al., *Developmental stage-specific regulation of atrial natriuretic*  
886 *factor gene transcription in cardiac cells*. Mol Cell Biol, 1994. **14**(1): p. 777-90.
- 887
- 888

889 **Figures**

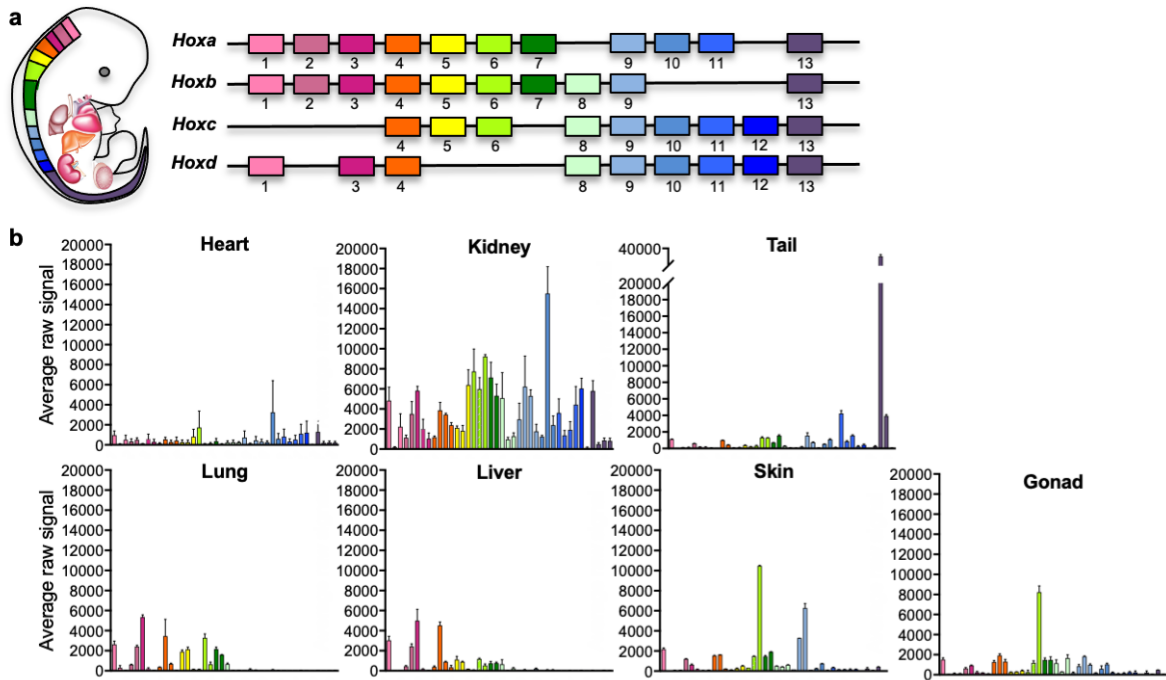

890

891 **Fig. 1: Positional Code of Organ Fibroblasts** a Murine Hox cluster code, showing  
892 proximally expressed Hox genes in pink and distal ones in purple. b Bar plots showing the  
893 average raw signal for all expressed *Hox* genes in organ-specific fibroblast samples. Data  
894 are mean  $\pm$  SEM of 3 biological replicates for each fibroblast type.

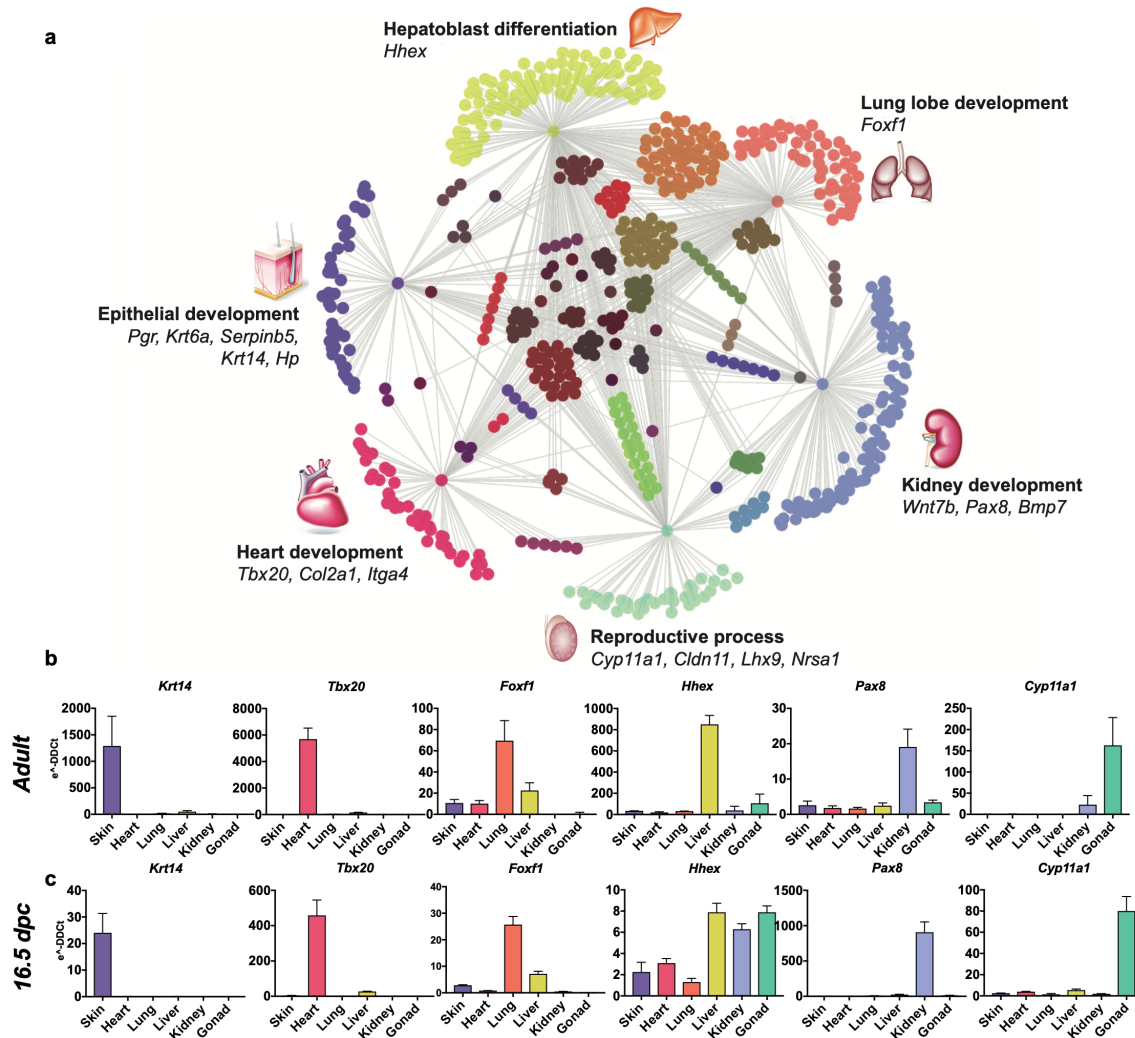

895

896 **Fig. 2: Embryological Molecular Signature of Organ Fibroblasts**

897 **a** Cytoscape representation of network of genes (dots) singularly expressed in organ  
 898 fibroblasts (only one grey edge between the gene and the organ) or shared among organs  
 899 (multiple grey edges linking the gene to several organs). Genes involved in organ  
 900 development are highlighted. **b-g** Validation of the expression of selected organ-enriched,  
 901 developmental related genes using qPCR on cultured organ-derived fibroblasts isolated  
 902 from adult mice (top row) or E16.5 embryos (bottom row). Data are mean  $\pm$  SEM of the  
 903  $e^{-DDCt}$  values, on 3 biological replicates. The housekeeping gene is *Hprt* and the  
 904 reference sample is tail fibroblasts.

*Fibroblast organ code*

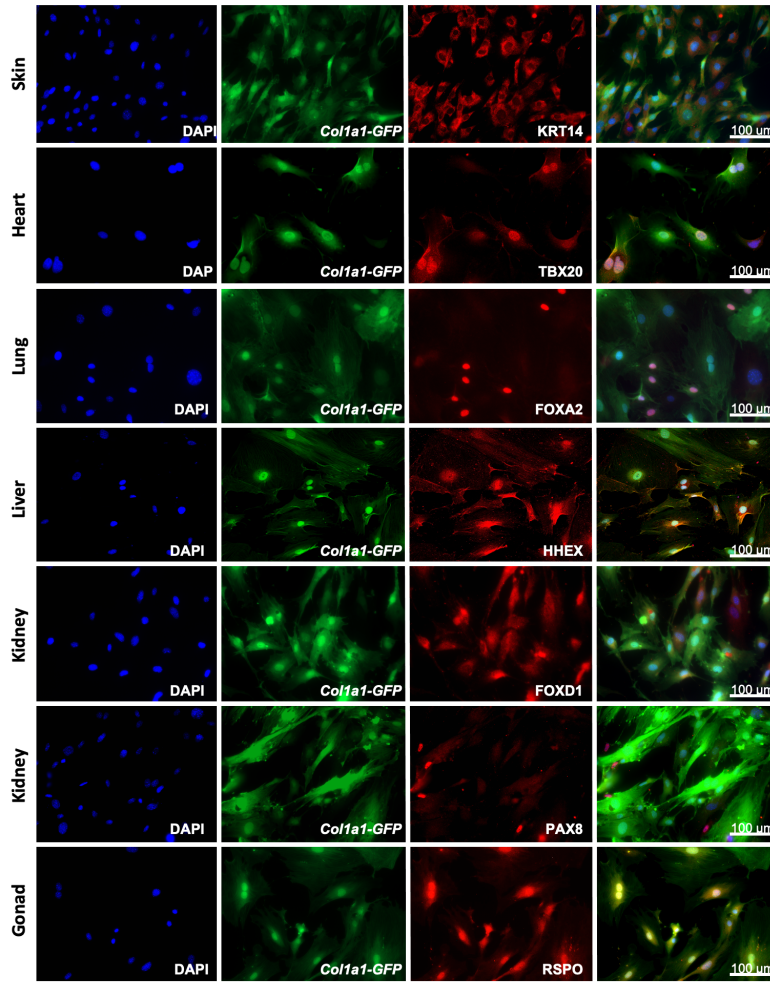

905

906 **Fig. 3: Adult fibroblasts express organ specific transcription factors.**

907 Immunocytochemistry for organ specific markers (KRT14, TBX20, FOXA2, HHEX,

908 FOXD1, PAX8, RSPO) on adult fibroblasts obtained from different organs of *Col1a1-GFP*

909 mice and cultured for 5 days. Scale bar =100um.



*Fibroblast organ code*

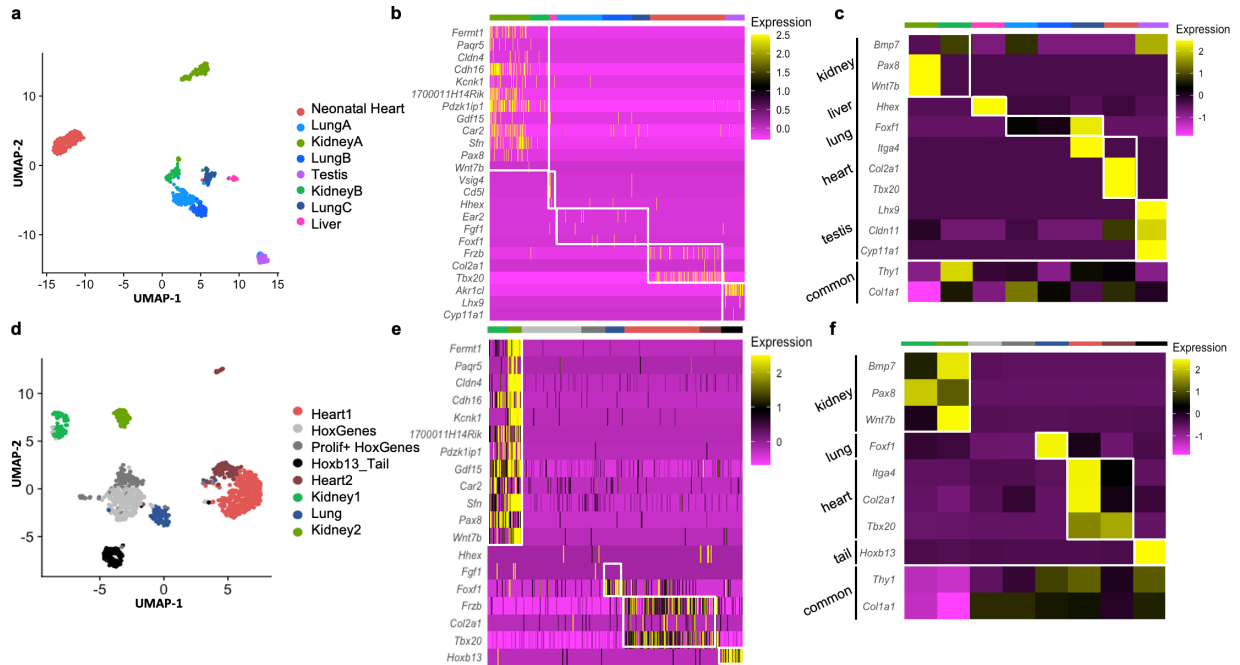

910

911 **Fig. 4: Analysis of organ specific signatures at the single cell level.** a-c Re-analysis of  
 912 the Mouse Cell Atlas stromal cell dataset. **a** UMAP visualization of selected stromal cell  
 913 populations (682 cells). **b** Heatmap representing the expression of top-organ specific  
 914 genes, identified from the bulkRNAseq comparison, on individual cells in the scRNAseq  
 915 dataset. **c** Heatmap showing the average expression per population of organ-development  
 916 related genes (same as shown in Fig.2). **d-f** scRNAseq analysis of mixed cultured stromal  
 917 cells of different origins. **d** UMAP visualization of the captured cells. **e** Heatmap  
 918 representing the expression of top-organ specific genes, identified from the bulkRNAseq  
 919 comparison, on individual cells. **c** Heatmap showing the average expression per population  
 920 of organ-development related genes (same as shown in Fig.2).

Fibroblast organ code

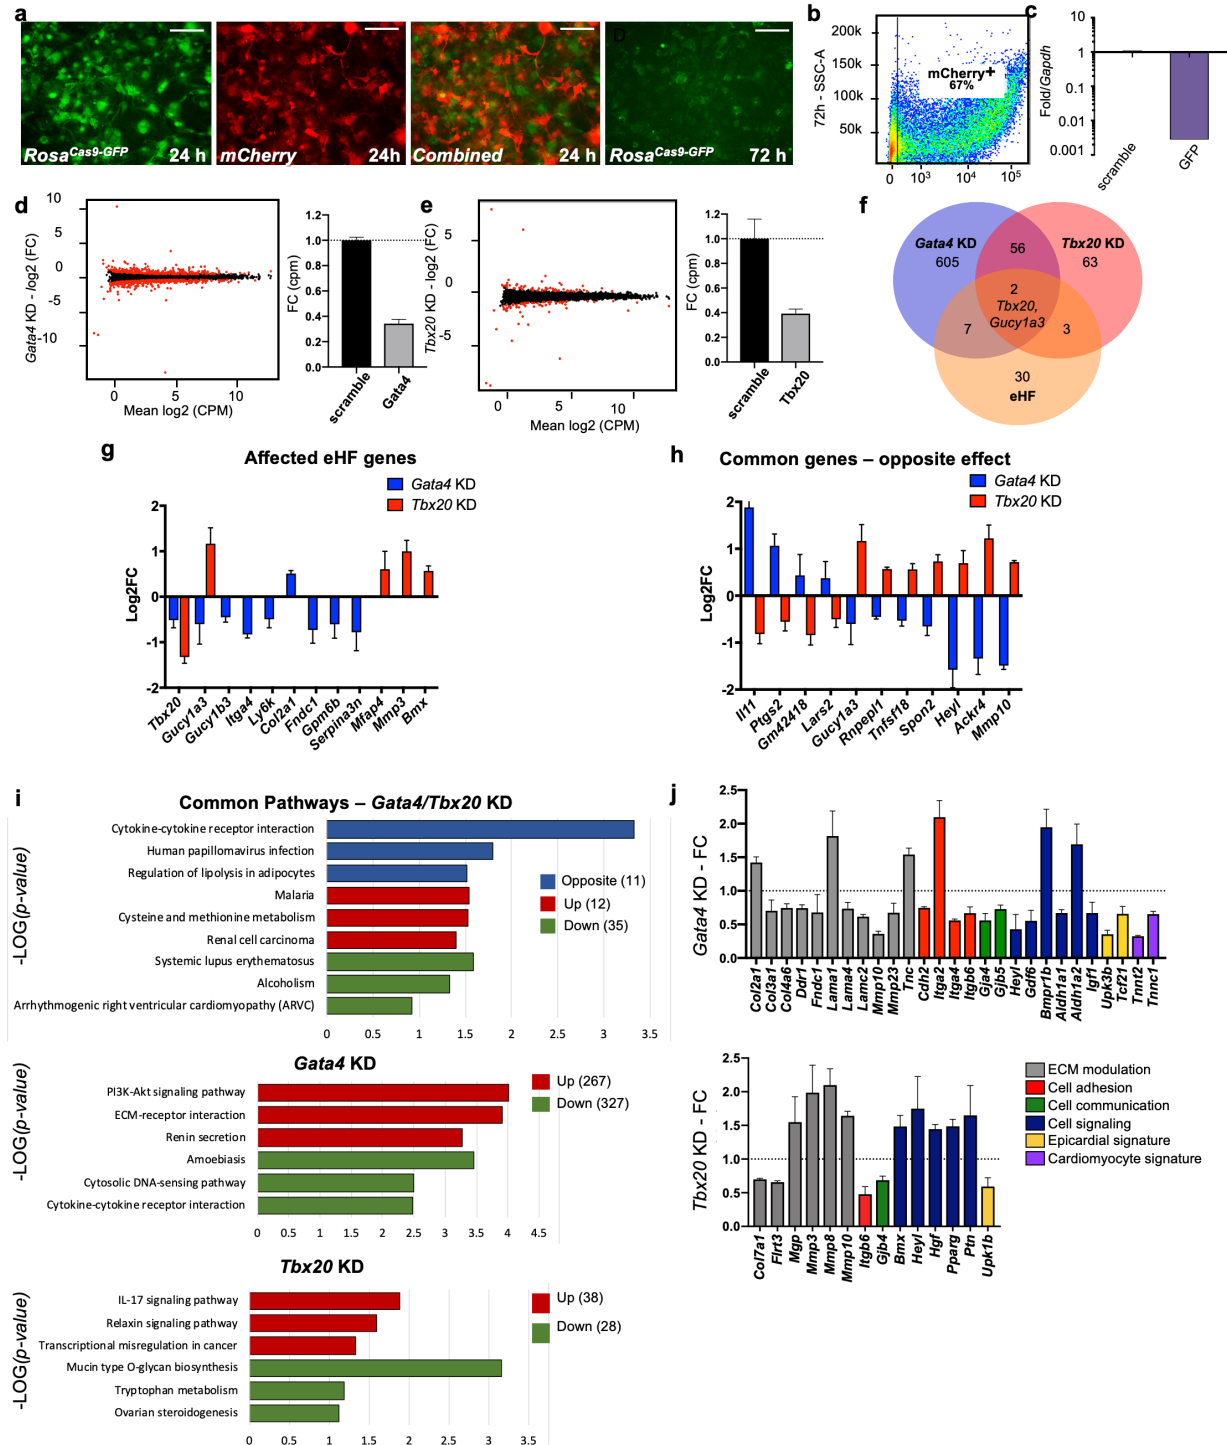

921

922

923

924

925

**Fig. 5: In vitro knock-down of core cardiac transcription factors.** **a** Images of adult cardiac fibroblasts derived from *RosaCas9-GFP* mice, 24 and 72 hours post-transfection with 2 guide RNAs for *GFP* and CleanCap® *mCherry* mRNA. **b** Flow cytometry plot showing the expression on *mCherry* in 67% of transfected cells (representative image of 3

*Fibroblast organ code*

926 independent experiments). **c** Relative quantification qPCR of *GFP*, normalized by *Gapdh*  
927 expression, in cells transfected with scrambled or GFP guide RNAs. **d** Volcano plots  
928 showing genes differentially expressed in *Gata4* (left) and *Tbx20* knock-downs (right).  
929 Fold change in expression of *Gata4* (left) and *Tbx20* (bottom) in cells transfected with  
930 specific gRNAs versus scramble RNA, quantified through RNA sequencing. **f** Venn  
931 diagram showing the overlap among genes affected by *Gata4* (*Gata4KD*) or *Tbx20*  
932 (*Tbx20KD*) knock-down and number of genes upregulated by 10-fold or more in heart  
933 fibroblasts (eHF) compared to other organs. **g** plot showing changes in expression of eHF  
934 genes affected by *Gata4* (in blue) or *Tbx20* (in red) knock-down. **h** Genes regulated by  
935 both *Gata4* and *Tbx20* in opposing manner. **i** KEGG Pathway analyses. Top panel: 58  
936 genes affected in both *Tbx20* and *Gata4* knock-down; Middle panel: 594 genes affected by  
937 *Gata4* knock-down; Bottom panel: 66 genes affected by *Tbx20* knock-down. Blue -  
938 pathway changed in opposite directions, Red - up-regulated pathways, Green – down-  
939 regulated pathways. **j**. Hand-picked genes illustrate alterations in processes known to affect  
940 the cardiac fibrotic response for *Gata4* or *Tbx20* knock-down. All data are represented as  
941 fold changes over scrambled control (Average  $\pm$  SEM; **d-j**) from bulk RNA-seq of 3  
942 biological replicates per condition.  
943

944

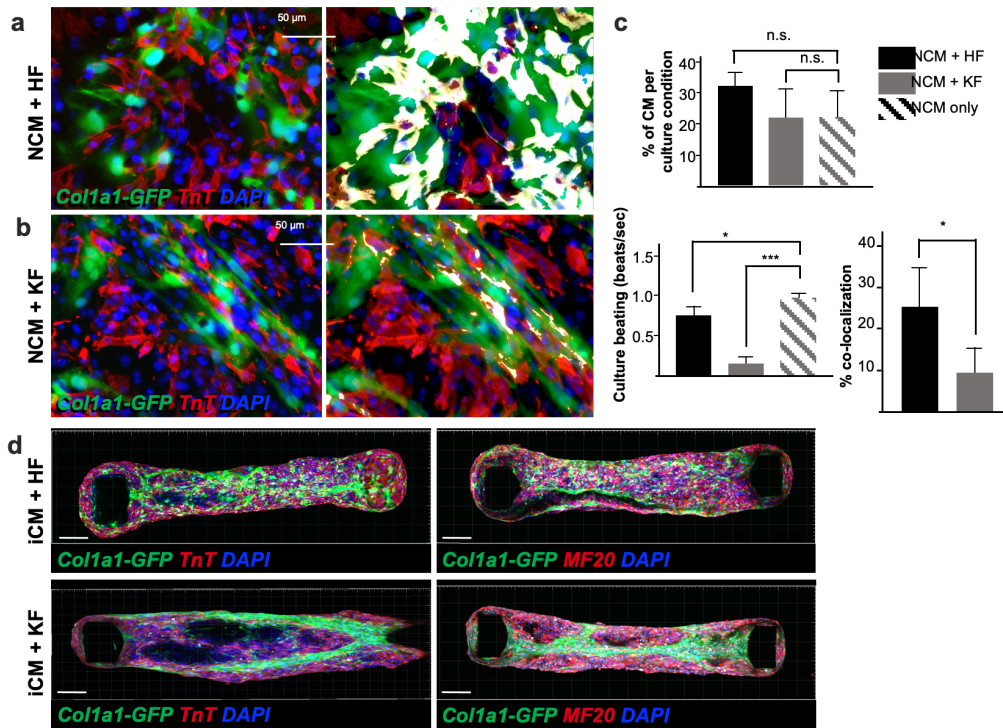

945

946 **Fig. 6: Adult fibroblasts retain tissue specific function *in vitro*: impaired neonatal**  
947 **cardiomyocyte beating in presence of kidney derived fibroblasts. a-b**

948 Immunocytochemistry for TnT on 2D co-culture of neonatal ventricular cardiomyocytes  
949 (NCM, TnT+ in red) with either adult cardiac fibroblasts (HF) in **a** or kidney fibroblasts  
950 (KF) in **b**, isolated from *Coll1a1-eGFP* mice (in green). Nuclei are labelled with DAPI (in  
951 blue). The right panel shows colocalization of the two cell types (green+ and red+) in white.

952 **c** quantifications of the percentage of cardiomyocytes per culture condition (top), beating  
953 of the 2D cultures expressed in beats per second (bottom left) and percentage of co-  
954 localization (bottom right).

955 **d** Confocal Z-stack images reconstructed with Imaris, of cardiac microtissues constituted of 85% hiPSCs derived Cardiomyocytes (iCM) and 15%  
956 of either cardiac (HF) or kidney (KF) fibroblasts, stained for TnT (in red, left panels) or  
957 MF20 (in red right panels). The adult fibroblasts were isolated from *Coll1a1-eGFP* mice  
958 (in green), nuclei stained with DAPI (in red). Scale bar= 50µm. All data in (c) are  
959 mean ± SEM on 3 independent experiments, p-values were calculated by two-sample t-test.

960

## Fibroblast organ code

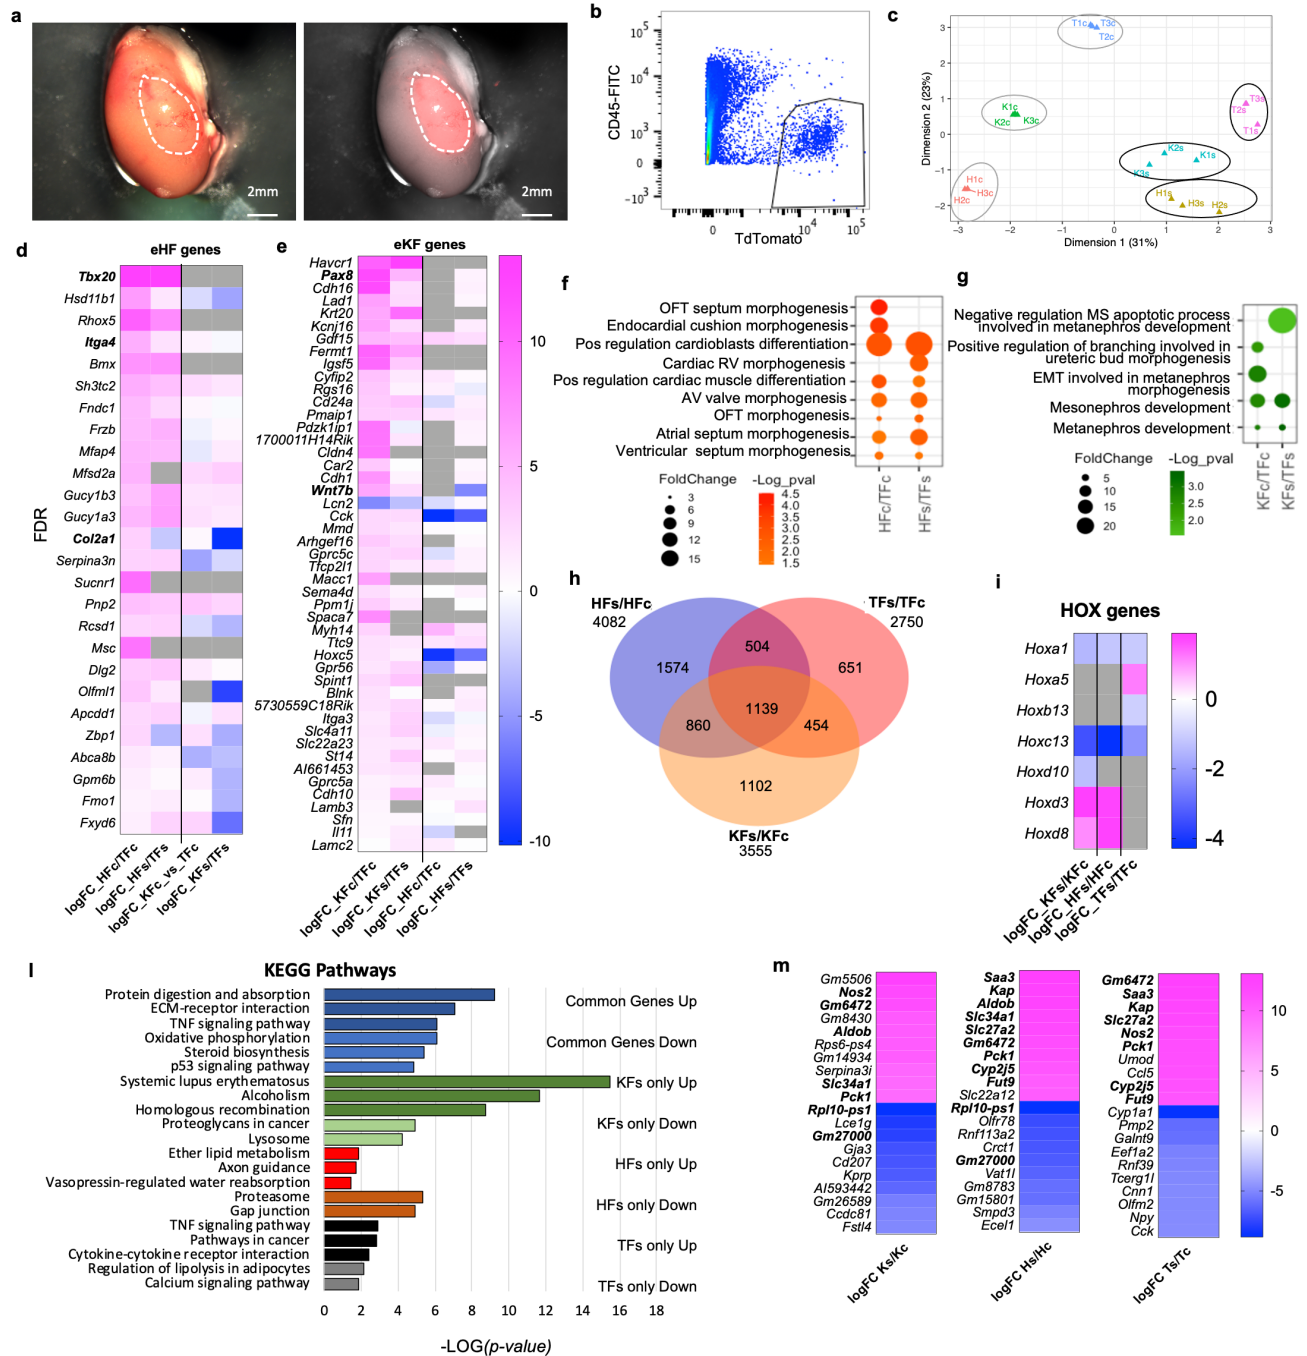

961

962 **Fig.7: Fibroblasts' tissue-specific response to *in vivo* ectopic transplantation under**

963 **the kidney capsule. a** Representative images of a dissected kidney: brightfield image on

964 the left; brightfield overlaid with the fluorescence image acquired in the red channel on the

965 right, to highlight the area where TdTomato+ cells were transplanted. **b** Flow cytometry

966 plot showing the gating strategy used to isolate live CD45-TdTomato+ cells 3 days post-

967 transplantation in the kidney capsule. **c** Multidimensional scaling plot calculated on the top

*Fibroblast organ code*

968 500 genes post-normalization, to visualize the level of transcriptomic similarity among all  
969 the samples. **d-h** analysis of the cell-specific identity by comparing the HF and KF gene  
970 expression to TF in culture (HFc/TFc, KFc/KFc) and post- transplant in the kidney capsule  
971 (HF/TFs, KF/KFs). **(d)** Heatmap showing the expression of significantly regulated eHF  
972 genes in the 4 conditions. **(e)**, Heatmap showing the expression of eKF genes in the 4  
973 conditions. **(f)** dot plot indicating the GO terms associated to cardiac development,  
974 identified from the DAVID database analysis of HFs or HFc enriched genes, **(g)** dot plot  
975 indicating the GO terms associated to cardiac development, identified from the DAVID  
976 database analysis of KFs or KFc enriched genes. **h-m** analysis of the differential expression  
977 by experimental condition: transplanted cells versus cells in culture HFs/HFc, TFs/TFc,  
978 KFs/KFc. **(h)** Venn diagram showing the significant differentially regulated genes  
979 (FDR<0.05) in the three comparison sets. Only genes with a logFC>1 or <-1 were  
980 considered. **(i)** Heatmap of differentially regulated Hox genes. **(l)** Bar plot of the KEGG  
981 pathway analysis on the common regulated genes (light blue-downregulated, dark blue-  
982 upregulated), and genes uniquely modulated in KF (dark green-upregulated, light green-  
983 downregulated), HF (red-upregulated, brown-downregulated), TF (black-upregulated,  
984 grey-downregulated). **(m)** Heatmaps showing the top 10 upregulated and top 10  
985 downregulated genes for each dataset. In bold are the genes shared in two different sets of  
986 comparisons. Data are means of 3 biological replicates per each condition. All the  
987 heatmaps **d-e-l-m** show the average logarithmic fold change. For **d-e** genes were ordered  
988 based on the FDR (smaller to larger value) of the comparison in the first column, HFc/TFc  
989 and KFc/TFc respectively. Dotplots **f-g** and bar plots **h-m** data were organized based on  
990 the logarithmic transformation of the p-values (-log(p-value)). eKF = kidney fibroblasts  
991 enriched genes, same as shown in Suppl. Fig.8, eHF= heart fibroblasts enriched genes,  
992 same as shown in Suppl. Fig.10, KFs= transplanted kidney fibroblasts, HFs=transplanted  
993 heart fibroblasts, TFs=transplanted tail fibroblasts, KFc= kidney fibroblasts in culture,  
994 HFc=heart fibroblasts in culture, TFc= tail fibroblasts in culture

995

996 **Supplementary Fig. 1. Isolation of fibroblasts from different organs.** **a** Representative  
997 FACS plot showing the gating strategy used to isolate CD45-CD31-CD90+ fibroblasts  
998 from different organs. **b** Relative expression of markers *Vim*, *Thy1*, *Col1a2* in fibroblasts

*Fibroblast organ code*

999 from gonads, heart, kidney, liver, lung, and skin, compared to tail. **c** Raw Ct values for  
1000 *Vim*, *Thy1*, *Colla2* and *Hprt1* qPCR analysis. Data are mean  $\pm$  SEM on 3 biological  
1001 replicates.

1002

1003 **Supplementary Fig. 2. Generic Molecular Signature of Organ Fibroblasts.** **a** High  
1004 signal intensity gene of all fibroblast samples without relative quantification were entered  
1005 in IPA and molecular pathways were generated, revealing common processes among all  
1006 fibroblasts. Most genes were involved in cell death and survival, cell signaling and  
1007 molecular transport and trafficking. **b** High intensity genes organized by cell compartment.  
1008 The microarray analysis was performed on 3 biological replicates per each fibroblasts type.

1009

1010 **Supplementary Fig.3. Pairwise comparison between the Hox code of organ**  
1011 **fibroblasts.** Related to Fig.1. Heat map plot showing the pairwise square Euclidean  
1012 distances based on raw signal intensity of organ fibroblasts (n=3). Smaller distance means  
1013 the two organ fibroblasts are transcriptionally more similar.

1014

1015 **Supplementary Fig. 4. Embryological Molecular Signature of Organ Fibroblasts.**  
1016 Related to Fig.2. Additional validations of the expression of some organ-enriched,  
1017 developmental related genes using qPCR, on adult and embryonic derived fibroblasts. Data  
1018 are mean  $\pm$  SEM on 3 biological replicates.

1019

1020 **Supplementary Fig. 5. Molecular Signature of Skin Fibroblasts.** **a** Heatmap  
1021 highlighting the genes differentially expressed over 10-fold solely in skin fibroblasts. **b-f**,  
1022 IPA analysis on genes highly expressed in skin fibroblasts (shown in **a**). **b** top 5 canonical  
1023 pathways with p-value and estimated percentage of overlap. **c** Top diseases and biological  
1024 functions. **d** Top networks and associated functions. **e** representation of a pathway related  
1025 to skin embryonic development (Morphogenesis of epithelial tissue) with related skin-  
1026 fibroblasts enriched genes. **f** graphic representation of the top network (highlighted with a  
1027 red arrow in **d**) overlaid with the expression of genes enriched in our dataset (circled in  
1028 pink) associated with skin disease and function. Red arrows point to all skin/derma related  
1029 terms.

1030

1031 **Supplementary Fig. 6. Molecular Signature of Lung Fibroblasts.**

1032 **a** Heatmap highlighting the genes differentially expressed over 10-fold solely in lung  
1033 fibroblasts. **b-f**, IPA analysis on genes highly expressed in lung fibroblasts (shown in **a**). **b**  
1034 top 5 canonical pathways with p-value and estimated percentage of overlap. **c** Top diseases  
1035 and biological functions. **d** Top networks and associated functions. **e** representation of a  
1036 development associated pathway (Respiratory system development) with related lung-  
1037 fibroblasts enriched genes. **f** graphic representation of the top network (highlighted with a  
1038 red arrow in **d**) overlaid with the expression of genes enriched in our dataset (circled in  
1039 pink), associated with lung development and function.

1040

1041 **Supplementary Fig. 7. Molecular Signature of Liver Fibroblasts. a** Heatmap  
1042 highlighting the genes differentially expressed over 10-fold solely in liver fibroblasts. **b-f**,  
1043 IPA analysis on genes highly expressed in liver fibroblasts (shown in **a**). **b** top 5 canonical  
1044 pathways with p-value and estimated percentage of overlap. **c** Top diseases and biological  
1045 functions. **d** Top networks and associated functions. **e** representation of a development  
1046 associated pathway (Development of liver) with related liver-fibroblasts enriched genes. **f**  
1047 graphic representation of the top network (highlighted with a red arrow in **d**) overlaid with  
1048 the expression of genes enriched in our dataset (circled in pink), associated with liver  
1049 abnormal development and function.

1050

1051 **Supplementary Fig. 8. Molecular Signature of Kidney Fibroblasts. a** Heatmap  
1052 highlighting the genes differentially expressed over 10-fold solely in kidney fibroblasts. **b-**  
1053 **f**, IPA analysis on genes highly expressed in kidney fibroblasts (shown in **a**). **b** top 5  
1054 canonical pathways with p-value and estimated percentage of overlap. **c** Top diseases and  
1055 biological functions. **d** Top networks and associated functions. **e** top toxicology lists,  
1056 including different list of genes associated with kidney injury. **f** representation of  
1057 development associated pathways (Development of metanephric mesenchyme,  
1058 metanephros, formation of kidneys) with related kidney-fibroblasts enriched genes. **g**  
1059 graphic representation of the top network (highlighted with a red arrow in **d**) overlaid with



*Fibroblast organ code*

1060 the expression of genes enriched in our dataset (circled in pink), associated with kidney  
1061 disease.

1062

1063 **Supplementary Fig. 9. Molecular Signature of Gonad Fibroblasts.** **a** Heatmap  
1064 highlighting the genes differentially expressed over 10-fold solely in gonad (testis)  
1065 fibroblasts. **b-f**, IPA analysis on genes highly expressed in gonad fibroblasts (shown in **a**).  
1066 **b** top 5 canonical pathways with p-value and estimated percentage of overlap. **c** Top  
1067 diseases and biological functions. **d** Top networks and associated functions. **e**  
1068 representation of development associated pathways (morphology of genital organs, sex  
1069 determination, size of genital organs), with related gonad-fibroblasts enriched genes. **f**  
1070 graphic representation of the top network (highlighted with a red arrow in **d**) overlaid with  
1071 the expression of genes enriched in our dataset (circled in pink), associated with  
1072 reproductive system development and dysfunction.

1073

1074 **Supplementary Fig. 10. Molecular Signature of Cardiac Fibroblasts.** **a** Heatmap  
1075 highlighting the genes differentially expressed over 10-fold solely in cardiac fibroblasts.  
1076 **b-f**, IPA analysis on genes highly expressed in cardiac fibroblasts (shown in **a**). **b** top 5  
1077 canonical pathways with p-value and estimated percentage of overlap. **c** Top diseases and  
1078 biological functions. **d** Top networks and associated functions. **e** representation of  
1079 development associated pathways (Development of pericardium, hyper-trabeculation,  
1080 innervation, hypoplastic heart syndrome) with related heart-fibroblasts enriched genes. **f**  
1081 graphic representation of the second top network (highlighted with a red arrow in **d**)  
1082 overlaid with the expression of genes enriched in our dataset (circled in pink), associated  
1083 with cardiac diseases and disorders. **g** Heatmap showing the expression of cardiac  
1084 fibroblasts-enriched genes in human left ventricular biopsies from healthy (N=5) and  
1085 chronic ischemic heart failure patients (N=5).

1086

1087 **Supplementary Fig. 11. Analysis of the organ specific fibroblasts heterogeneity at**  
1088 **single cell level.** Related to Fig.4. Data derived from the re-analysis of Mouse Cell Atlas  
1089 stromal cell dataset. **a** Heatmap showing the top differentially expressed genes in each cell  
1090 of the sub-cluster Lung A-B-C. The genes were identified by pairwise differential

*Fibroblast organ code*

1091 expression of Lung C versus Lung A, LungC versus Lung B and Lung B versus Lung A.  
1092 **b** Heatmap showing the average expression per sub-population of key-defining gene and  
1093 the lung-development related genes (*Foxf1*). **c** Heatmap showing the top differentially  
1094 expressed genes in kidneyA-B. The genes were identified by pairwise differential  
1095 expression. **d** Heatmap showing the average expression per sub-population of key defining  
1096 genes and the kidney-development related genes (*Pax8, Wnt7b, Bmp7*).

1097

1098 **Supplementary Fig. 12. Analysis of the organ specific fibroblasts heterogeneity at**  
1099 **single cell level.** Related to Fig.4. Data derived from cultured fibroblasts scRNAseq data  
1100 generated in this manuscript. **a.** Heatmap showing top differentially expressed genes  
1101 between Heart 1 and 2, **b** Heatmap showing the average expression per sub-population of  
1102 key defining genes and the heart-development related genes (*Itga4, Col2a1, Tbx20*). **e.**  
1103 Heatmap showing the expression of genes identified by pairwise differential expression  
1104 analysis of freshly isolated kidney fibroblasts (same as in **Supplementary Fig. 8c**), **f**  
1105 Heatmap showing top differentially expressed genes between Kidney 1 and 2, **g** Heatmap  
1106 showing the average expression per sub-population of key defining genes and the kidney-  
1107 development related genes (*Pax8, Wnt7b, Bmp7*).

1108

1109 **Supplementary Fig. 13. Analysis of the fibroblast's specific response to transplant**  
1110 **under the kidney capsule.** Related to Fig.7. **a.** Table showing the genes associated to the  
1111 top KEGG pathways in Fig 7m, **b** Canonical pathways identified through Ingenuity  
1112 Pathway Analysis of the differentially expressed genes, ordered by significance (-LOG of  
1113 the B-H p-value) and colored by the activation z-score predicted for the three comparisons  
1114 HFs/HFc, TFs/TFc, KFs/KFc.

1115

1116 **Supplementary Table 1. Microarray data: highly expressed genes common to all**  
1117 **organ-specific fibroblast populations, classified based on cellular process or cellular**  
1118 **localization.**

1119

*Fibroblast organ code*

1120 **Supplementary Table 2. Microarray data: average raw expression and standard**  
1121 **errors of Hox code genes across all fibroblast samples from the microarray analysis**  
1122 **(n=3).**

1123

1124 **Supplementary Table 3. Microarray data: expression of genes that were enriched by**  
1125 **10-fold change or more in single organ fibroblasts compared to tail fibroblasts (n=3).**

1126

1127 **Supplementary Table 4. Expression of cardiac fibroblasts enriched genes in human**  
1128 **left ventricular biopsies from healthy and chronic ischemic heart failure patients.**

1129

1130 **Supplementary Table 5. Analysis of the stromal cell aggregate from the Mouse Cell**  
1131 **Atlas: markers genes per each population, and markers identified by pairwise**  
1132 **comparison of the 2 kidney and 3 lung populations.**

1133

1134 **Supplementary Table 6. Analysis of in-house scRNAseq data of merged cultured**  
1135 **fibroblasts from different organs: markers genes per each population, and markers**  
1136 **identified by pairwise comparison of the 2 kidney and 2 cardiac populations.**

1137

1138 **Supplementary table 7: CRISPR-Cas9 experiments: sequence of the guide RNAs;**  
1139 **differential expressed genes between Tbx20 and Gata4 KD and the correspondent**  
1140 **controls. KEGG pathways analysis.**

1141

1142 **Supplementary Table 8. Sequence of all the qPCR primers used in the study.**

1143

1144 **Supplementary video 1. Co-culture of adult cardiac fibroblasts with neonatal**  
1145 **ventricular cardiomyocytes. 20x magnification.**

1146

1147 **Supplementary video 2. Co-culture of adult kidney fibroblasts with neonatal**  
1148 **ventricular cardiomyocytes. 20x magnification.**

1149
